# Supplementary material for: Elevated Potassium Levels in Patients With Congestive Heart Failure: Occurrence, Risk Factors, and Clinical Outcomes: A Danish Population‐Based Cohort Study
Source: PubMed Central journal article supplement — J Am Heart Assoc. 2018 May 22;7(11):e008912. doi: 10.1161/JAHA.118.008912 (PMC6015368; doi:10.1161/jaha.118.008912), 2018-05-22
Supplement: JAH3-7-e008912-s001.pdf [file JAH3-7-e008912-s001.pdf]

# **SUPPLEMENTAL MATERIAL**

**Table S1. Codes used to identify study variables.**

|                                                               | <b>Algorithm</b>                                                                                                                                                                                                                                                                                                                                                                                                                                                                                |
|---------------------------------------------------------------|-------------------------------------------------------------------------------------------------------------------------------------------------------------------------------------------------------------------------------------------------------------------------------------------------------------------------------------------------------------------------------------------------------------------------------------------------------------------------------------------------|
| Heart failure                                                 | ICD-8: 427.0, 427.1<br>ICD-10: I50, I110, I130, I132                                                                                                                                                                                                                                                                                                                                                                                                                                            |
| Cardiomyopathy                                                | ICD-10: I42                                                                                                                                                                                                                                                                                                                                                                                                                                                                                     |
| Valvular heart disease                                        | ICD-10: I00-I02, I05-I09, I34, I35, I36, I37, Q20-Q25, Q22, Q23                                                                                                                                                                                                                                                                                                                                                                                                                                 |
| Myocardial infarction                                         | ICD-10: I21;I22;I23                                                                                                                                                                                                                                                                                                                                                                                                                                                                             |
| Atrial fibrillation or flutter                                | ICD-10: I48                                                                                                                                                                                                                                                                                                                                                                                                                                                                                     |
| Echocardiography                                              | UXUC80                                                                                                                                                                                                                                                                                                                                                                                                                                                                                          |
| Diabetes                                                      | defined as a previous hospitalization with a hospital diagnosis of diabetes (ICD-8 259-250; ICD-10 E10-E14, H360), or at least one previous prescription for a glucose-lowering drug (ATC code A10), or presence of two occurrences of a HbA1c measurement > 6.5%                                                                                                                                                                                                                               |
| Chronic kidney disease                                        | Defined as either a previous hospitalization with a hospital diagnosis of chronic nephritic syndrome (N03), glomerular disease (N08), chronic kidney disease / chronic renal failure (N18-N19), diabetic nephropathy (E102, E112, E122, E132, E142), or hypertension with renal failure (I120, I131, I132); or a previous dialysis procedure (BJFD2); or presence of two occurrences more than 90 days apart of a creatinine measurement corresponding to an eGFR <60 mL/min/1.73m <sup>2</sup> |
| Hypertension                                                  | defined as a previous hospitalization with a hospital diagnosis of hypertension (I10-I15) or a previous prescription for at least two of the following classes of antihypertensive drugs: adrenergic blockers and others (C02), non-loop diuretics (C03A, C03B, C03D, C03E), $\beta$ blockers (C07), calcium channel blockers (C08), RAAS inhibitors (C09)                                                                                                                                      |
| Peripheral vascular disease                                   | ICD-10: I70; I71; I72; I73; I74; I77                                                                                                                                                                                                                                                                                                                                                                                                                                                            |
| Cerebrovascular disease                                       | ICD-10: I60-I69; G45; G46                                                                                                                                                                                                                                                                                                                                                                                                                                                                       |
| Chronic pulmonary disease                                     | ICD-10: J40-J47; J60-J67; J68.4; J70.1; J70.3; J84.1; J92.0; J96.1; J98.2; J98.3                                                                                                                                                                                                                                                                                                                                                                                                                |
| Peptic ulcer disease                                          | ICD-10: K22.1; K25-K28                                                                                                                                                                                                                                                                                                                                                                                                                                                                          |
| Any malignant disease                                         | ICD-10: C00-C96                                                                                                                                                                                                                                                                                                                                                                                                                                                                                 |
| Alcoholism-related or other substance-abuse related disorders | ICD-10: T36-T65; F10-F19; G312; G621; G721; I 426; K292; K860; K70; R780; T51; Z714; Z721                                                                                                                                                                                                                                                                                                                                                                                                       |
| Medical obesity                                               | ICD-10: E65-E66                                                                                                                                                                                                                                                                                                                                                                                                                                                                                 |
| ACEis                                                         | ATC: C09A, C09B                                                                                                                                                                                                                                                                                                                                                                                                                                                                                 |
| ARBs                                                          | ATC: C09C, C09D                                                                                                                                                                                                                                                                                                                                                                                                                                                                                 |
| Beta-blockers                                                 | ATC: C07                                                                                                                                                                                                                                                                                                                                                                                                                                                                                        |
| Potassium-sparing diuretics (spironolactone etc.)             | ATC: C03D, C03E                                                                                                                                                                                                                                                                                                                                                                                                                                                                                 |
| Non-steroidal inflammatory drugs                              | ATC:M01A                                                                                                                                                                                                                                                                                                                                                                                                                                                                                        |
| Macrolides                                                    | J01FA                                                                                                                                                                                                                                                                                                                                                                                                                                                                                           |
| Trimethoprim                                                  | J01EA, J01EE                                                                                                                                                                                                                                                                                                                                                                                                                                                                                    |

|                                             |                                                                                                                                                          |
|---------------------------------------------|----------------------------------------------------------------------------------------------------------------------------------------------------------|
| Potassium supplements                       | ATC: A12B                                                                                                                                                |
| Hospitalization with any cardiac diagnoses  | ICD-10: DI00-DI99                                                                                                                                        |
| Hospitalization with ventricular arrhythmia | ICD-10: DI47, DI49                                                                                                                                       |
| Hospitalization with cardiac arrest         | ICD-10: DI46                                                                                                                                             |
| Hospitalization with ICU admission          | Codes: NABE, NABB                                                                                                                                        |
| Hospitalization with dialysis procedure     | Codes: BJFD2                                                                                                                                             |
| Hospitalization with ventilator treatment   | Codes: BGDA0                                                                                                                                             |
| Hyperkalemia                                | Code NPU03230. Analysis numbers AAA00958, 110262, 111262 115230, 115231, 1511140, 1610147, 1613230, 1710304, 1713230, 1813230, 1817159, 1311140, 1411140 |

---

Abbreviations: ATC, anatomical therapeutic chemical classification; ICD, international classification of diseases

**Table S2. Baseline characteristics of patients with incident heart failure in Northern Denmark, 2000-2012. Incidences of any (>5.0 mmol/L), moderate (>5.5 mmol/L), and severe (>6.0 mmol/L) hyperkalemia (HK) events are shown according to each characteristic.**

**Hyperkalemia event is defined as >5.0 mmol/L**

|                                                                     | <i>Number</i>  | <i>Median years to first HK event</i> | <i>Median number of measurements before the first HK event</i> | <i>Total person-years of follow-up (1,000)</i> | <i>Median person-years of follow-up</i> | <i>Incidence rate of HK per 1,000 person-years (95% CI)</i> | <i>1-year cumulative incidence proportion of HK (95% CI)</i> | <i>3-year cumulative incidence proportion of HK (95% CI)</i> |
|---------------------------------------------------------------------|----------------|---------------------------------------|----------------------------------------------------------------|------------------------------------------------|-----------------------------------------|-------------------------------------------------------------|--------------------------------------------------------------|--------------------------------------------------------------|
| Total number                                                        | 31,649 (100%)  | 0.34                                  | 8                                                              | 69.32                                          | 0.86                                    | 178.02 (174.89-181.19)                                      | 25.2 (24.5-25.8)                                             | 32.1 (31.4-32.9)                                             |
| <b>Year of diagnosis</b>                                            |                |                                       |                                                                |                                                |                                         |                                                             |                                                              |                                                              |
| 2000-2006                                                           | 19,286 (60.9%) | 0.64                                  | 8                                                              | 53.03                                          | 1.14                                    | 147.24 (144.00-150.55)                                      | 22.6 (21.8-23.4)                                             | 30.3 (29.4-31.2)                                             |
| 2007-2012                                                           | 12,363 (39.1%) | 0.14                                  | 7                                                              | 16.28                                          | 0.59                                    | 278.25 (270.21-286.47)                                      | 29.1 (28.0-30.3)                                             | 35.0 (33.7-36.3)                                             |
| <b>Sex</b>                                                          |                |                                       |                                                                |                                                |                                         |                                                             |                                                              |                                                              |
| Women                                                               | 14,809 (46.8%) | 0.32                                  | 7                                                              | 31.70                                          | 0.80                                    | 178.88 (174.26-183.60)                                      | 24.6 (23.7-25.5)                                             | 31.5 (30.4-32.6)                                             |
| Men                                                                 | 16,840 (53.2%) | 0.35                                  | 8                                                              | 37.62                                          | 0.91                                    | 177.29 (173.06-181.60)                                      | 25.7 (24.8-26.5)                                             | 32.7 (31.6-33.7)                                             |
| <b>Age at diagnosis, years</b>                                      |                |                                       |                                                                |                                                |                                         |                                                             |                                                              |                                                              |
| Median (quartiles)                                                  | 78 (69.1-84.9) |                                       |                                                                |                                                |                                         |                                                             |                                                              |                                                              |
| <18                                                                 | 80 (0.3%)      | 0.06                                  | 1                                                              | 0.24                                           | 0.41                                    | 161.39 (114.21-221.52)                                      | 41.3 (22.9-59.6)                                             | 43.8 (24.4-63.1)                                             |
| 18-44                                                               | 582 (1.8%)     | 0.31                                  | 9                                                              | 2.11                                           | 2.36                                    | 99.69 (86.66-114.12)                                        | 23.2 (18.7-27.7)                                             | 28.0 (22.9-33.1)                                             |
| 45-59                                                               | 2,851 (9.0%)   | 0.47                                  | 9                                                              | 10.83                                          | 2.54                                    | 95.61 (89.87-101.61)                                        | 21.4 (19.5-23.3)                                             | 27.8 (25.6-30.1)                                             |
| 60-69                                                               | 5,044 (15.9%)  | 0.47                                  | 9                                                              | 14.91                                          | 1.63                                    | 146.97 (140.88-153.26)                                      | 26.1 (24.4-27.7)                                             | 33.8 (31.8-35.8)                                             |
| 70-79                                                               | 9,376 (29.6%)  | 0.45                                  | 9                                                              | 21.54                                          | 0.98                                    | 185.23 (179.52-191.06)                                      | 26.2 (25.0-27.4)                                             | 33.9 (32.5-35.4)                                             |
| >=80                                                                | 13,716 (43.3%) | 0.21                                  | 6                                                              | 19.70                                          | 0.44                                    | 247.51 (240.61-254.56)                                      | 24.9 (23.9-25.9)                                             | 31.3 (30.2-32.5)                                             |
| <b>Lowest level of eGFR measured before hyperkalemia/index date</b> |                |                                       |                                                                |                                                |                                         |                                                             |                                                              |                                                              |

**Hyperkalemia event is defined as >5.0 mmol/L**

|                                              | <i>Number</i>  | <i>Median years to first HK event</i> | <i>Median number of measurements before the first HK event</i> | <i>Total person-years of follow-up (1,000)</i> | <i>Median person-years of follow-up</i> | <i>Incidence rate of HK per 1,000 person-years (95% CI)</i> | <i>1-year cumulative incidence proportion of HK (95% CI)</i> | <i>3-year cumulative incidence proportion of HK (95% CI)</i> |
|----------------------------------------------|----------------|---------------------------------------|----------------------------------------------------------------|------------------------------------------------|-----------------------------------------|-------------------------------------------------------------|--------------------------------------------------------------|--------------------------------------------------------------|
| No values below 60 mL/min/1.73m <sup>2</sup> | 7,679 (24.3%)  | 0.53                                  | 9                                                              | 21.52                                          | 1.65                                    | 125.74 (121.05-130.57)                                      | 21.3 (20.1-22.4)                                             | 28.5 (27.1-29.9)                                             |
| eGFR 45-59 mL/min/1.73m <sup>2</sup>         | 6,931 (21.9%)  | 0.43                                  | 9                                                              | 15.24                                          | 0.98                                    | 189.28 (182.44-196.32)                                      | 26.1 (24.7-27.5)                                             | 34.5 (32.8-36.2)                                             |
| eGFR 30-44 mL/min/1.73m <sup>2</sup>         | 5,800 (18.3%)  | 0.19                                  | 7                                                              | 8.67                                           | 0.40                                    | 325.49 (313.60-337.73)                                      | 35.0 (33.1-36.9)                                             | 43.4 (41.2-45.7)                                             |
| eGFR 15-29 mL/min/1.73m <sup>2</sup>         | 3,707 (11.7%)  | 0.08                                  | 5                                                              | 3.48                                           | 0.15                                    | 569.77 (544.97-595.40)                                      | 43.6 (40.8-46.5)                                             | 50.6 (47.4-53.9)                                             |
| eGFR<15 mL/min/1.73m <sup>2</sup>            | 1,166 (3.7%)   | 0.07                                  | 6                                                              | 0.82                                           | 0.10                                    | 786.16 (726.47-849.45)                                      | 48.1 (42.6-53.6)                                             | 52.9 (46.8-59.0)                                             |
| Dialysis                                     | 298 (0.9%)     | 0.17                                  | 8                                                              | 0.20                                           | 0.20                                    | 827.42 (706.69-962.87)                                      | 47.7 (36.8-58.5)                                             | 55.0 (42.5-67.6)                                             |
| No eGFR recorded                             | 6,068 (19.2%)  | 3.91                                  | 7                                                              | 19.39                                          | 1.92                                    | 58.49 (55.14-62.00)                                         | 2.8 (2.4-3.2)                                                | 6.9 (6.2-7.6)                                                |
| <b>Conditions underlying heart failure</b>   |                |                                       |                                                                |                                                |                                         |                                                             |                                                              |                                                              |
| Cardiomyopathy                               | 1,341 (4.2%)   | 0.38                                  | 8                                                              | 3.61                                           | 1.41                                    | 153.73 (141.21-167.07)                                      | 26.8 (23.5-30.0)                                             | 34.1 (30.2-37.9)                                             |
| Valvular heart disease                       | 4,262 (13.5%)  | 0.25                                  | 8                                                              | 7.67                                           | 0.59                                    | 236.90 (226.13-248.04)                                      | 29.8 (27.8-31.8)                                             | 36.7 (34.5-39.0)                                             |
| Myocardial infarction                        | 6,787 (21.4%)  | 0.36                                  | 8                                                              | 14.43                                          | 0.82                                    | 192.57 (185.48-199.87)                                      | 26.43 (25.01-27.86)                                          | 34.18 (32.47-35.90)                                          |
| Ischemic heart disease                       | 12,734 (40.2%) | 0.33                                  | 8                                                              | 27.37                                          | 0.80                                    | 189.95 (184.82-195.18)                                      | 26.7 (25.6-27.7)                                             | 34.1 (32.9-35.4)                                             |
| Atrial fibrillation                          | 11,094 (35.1%) | 0.38                                  | 8                                                              | 23.60                                          | 0.88                                    | 183.59 (178.16-189.14)                                      | 25.1 (24.0-26.1)                                             | 32.0 (30.8-33.3)                                             |
| <b>Other comorbidities</b>                   |                |                                       |                                                                |                                                |                                         |                                                             |                                                              |                                                              |
| Diabetes                                     | 6,076 (19.2%)  | 0.25                                  | 7                                                              | 10.12                                          | 0.53                                    | 292.43 (281.99-303.16)                                      | 33.7 (31.9-35.5)                                             | 42.0 (39.9-44.1)                                             |

**Hyperkalemia event is defined as >5.0 mmol/L**

|                                              | <i>Number</i>  | <i>Median years to first HK event</i> | <i>Median number of measurements before the first HK event</i> | <i>Total person-years of follow-up (1,000)</i> | <i>Median person-years of follow-up</i> | <i>Incidence rate of HK per 1,000 person-years (95% CI)</i> | <i>1-year cumulative incidence proportion of HK (95% CI)</i> | <i>3-year cumulative incidence proportion of HK (95% CI)</i> |
|----------------------------------------------|----------------|---------------------------------------|----------------------------------------------------------------|------------------------------------------------|-----------------------------------------|-------------------------------------------------------------|--------------------------------------------------------------|--------------------------------------------------------------|
| Chronic kidney disease                       | 12,995 (41.1%) | 0.16                                  | 7                                                              | 17.89                                          | 0.34                                    | 352.13 (343.48-360.93)                                      | 36.0 (34.7-37.3)                                             | 44.1 (42.6-45.6)                                             |
| Hypertension                                 | 19,581 (61.9%) | 0.32                                  | 8                                                              | 39.23                                          | 0.75                                    | 207.92 (203.43-212.48)                                      | 27.4 (26.5-28.3)                                             | 35.1 (34.0-36.1)                                             |
| Peripheral vascular disease                  | 3,673 (11.6%)  | 0.24                                  | 8                                                              | 5.50                                           | 0.47                                    | 294.47 (280.31-309.16)                                      | 31.55 (29.36-33.75)                                          | 38.77 (36.20-41.34)                                          |
| Cerebrovascular disease                      | 5,489 (17.3%)  | 0.26                                  | 7                                                              | 9.02                                           | 0.52                                    | 225.12 (215.44-235.13)                                      | 25.49 (23.94-27.03)                                          | 32.17 (30.35-34.00)                                          |
| Chronic pulmonary disease                    | 5,838 (18.4%)  | 0.30                                  | 8                                                              | 9.96                                           | 0.63                                    | 238.30 (228.81-248.09)                                      | 27.18 (25.62-28.75)                                          | 34.58 (32.72-36.45)                                          |
| Peptic ulcer disease                         | 3,029 (9.6%)   | 0.24                                  | 8                                                              | 4.96                                           | 0.48                                    | 249.32 (235.62-263.61)                                      | 28.62 (26.37-30.88)                                          | 35.42 (32.79-38.06)                                          |
| Any malignant disease                        | 4,778 (15.1%)  | 0.21                                  | 7                                                              | 6.78                                           | 0.41                                    | 261.51 (249.48-273.97)                                      | 26.6 (24.9-28.3)                                             | 32.8 (30.8-34.8)                                             |
| Alcoholism-related disorders                 | 2,420 (7.6%)   | 0.27                                  | 8                                                              | 4.56                                           | 0.71                                    | 225.82 (212.23-240.05)                                      | 29.3 (26.7-31.8)                                             | 36.7 (33.7-39.7)                                             |
| Medical obesity                              | 2,159 (6.8%)   | 0.40                                  | 9                                                              | 5.13                                           | 1.12                                    | 190.21 (178.46-202.53)                                      | 28.3 (25.7-31.0)                                             | 36.7 (33.5-39.9)                                             |
| <b>Drug treatment before first admission</b> |                |                                       |                                                                |                                                |                                         |                                                             |                                                              |                                                              |
| ACEis overall                                | 7,430 (23.5%)  | 0.29                                  | 7                                                              | 14.20                                          | 0.75                                    | 224.90 (217.17-232.84)                                      | 29.0 (27.6-30.5)                                             | 36.8 (35.1-38.5)                                             |
| Ramipril                                     | 2,714 (8.6%)   | 0.21                                  | 7                                                              | 4.80                                           | 0.67                                    | 242.45 (228.72-256.80)                                      | 30.8 (28.3-33.3)                                             | 38.1 (35.1-41.0)                                             |
| Enalapril                                    | 2,077 (6.6%)   | 0.30                                  | 8                                                              | 3.62                                           | 0.65                                    | 259.35 (243.03-276.47)                                      | 31.7 (28.8-34.6)                                             | 40.0 (36.5-43.5)                                             |
| Other ACEis                                  | 2,271 (7.2%)   | 0.56                                  | 8                                                              | 5.24                                           | 1.01                                    | 180.43 (169.11-192.31)                                      | 24.0 (21.7-26.4)                                             | 32.4 (29.6-35.3)                                             |

**Hyperkalemia event is defined as >5.0 mmol/L**

|                             | <i>Number</i>  | <i>Median years to first HK event</i> | <i>Median number of measurements before the first HK event</i> | <i>Total person-years of follow-up (1,000)</i> | <i>Median person-years of follow-up</i> | <i>Incidence rate of HK per 1,000 person-years (95% CI)</i> | <i>1-year cumulative incidence proportion of HK (95% CI)</i> | <i>3-year cumulative incidence proportion of HK (95% CI)</i> |
|-----------------------------|----------------|---------------------------------------|----------------------------------------------------------------|------------------------------------------------|-----------------------------------------|-------------------------------------------------------------|--------------------------------------------------------------|--------------------------------------------------------------|
| ACEis/diuretics combination | 1,129 (3.6%)   | 0.23                                  | 8                                                              | 2.13                                           | 0.77                                    | 212.13 (193.01-232.65)                                      | 27.4 (23.8-31.0)                                             | 34.4 (30.1-38.6)                                             |
| ARBs overall                | 3,403 (10.8%)  | 0.27                                  | 8                                                              | 6.35                                           | 0.75                                    | 230.84 (219.18-242.97)                                      | 29.8 (27.6-32.0)                                             | 37.3 (34.7-39.9)                                             |
| Losartan                    | 1,437 (4.5%)   | 0.25                                  | 8                                                              | 2.65                                           | 0.73                                    | 209.33 (192.26-227.51)                                      | 27.1 (24.0-30.3)                                             | 32.8 (29.2-36.4)                                             |
| Candesartan                 | 579 (1.8%)     | 0.29                                  | 7                                                              | 1.03                                           | 0.77                                    | 300.13 (267.65-335.47)                                      | 37.1 (30.9-43.4)                                             | 47.8 (40.0-55.6)                                             |
| Other ARBs                  | 512 (1.6%)     | 0.25                                  | 7                                                              | 1.03                                           | 0.82                                    | 243.75 (214.52-275.84)                                      | 34.2 (27.9-40.4)                                             | 43.4 (35.8-50.9)                                             |
| ARBs/diuretics combination  | 1,129 (3.6%)   | 0.23                                  | 8                                                              | 2.13                                           | 0.77                                    | 212.13 (193.01-232.65)                                      | 27.4 (23.8-31.0)                                             | 34.4 (30.1-38.6)                                             |
| Beta-blockers               | 9,742 (30.8%)  | 0.33                                  | 8                                                              | 20.27                                          | 0.88                                    | 190.75 (184.78-196.86)                                      | 26.0 (24.8-27.2)                                             | 33.1 (31.7-34.5)                                             |
| Spironolactone              | 3,451 (10.9%)  | 0.26                                  | 7                                                              | 6.09                                           | 0.55                                    | 240.43 (228.27-253.07)                                      | 28.7 (26.6-30.8)                                             | 36.4 (33.8-38.9)                                             |
| Potassium supplements       | 9,537 (30.1%)  | 0.28                                  | 8                                                              | 16.54                                          | 0.60                                    | 219.95 (212.86-227.22)                                      | 25.4 (24.2-26.6)                                             | 32.1 (30.7-33.5)                                             |
| Loop diuretics              | 12,484 (39.4%) | 0.28                                  | 8                                                              | 20.86                                          | 0.56                                    | 243.39 (236.74-250.18)                                      | 27.4 (26.3-28.5)                                             | 34.7 (33.4-36.0)                                             |
| NSAIDs                      | 7,076 (22.4%)  | 0.35                                  | 8                                                              | 15.46                                          | 0.93                                    | 178.24 (171.64-185.02)                                      | 25.0 (23.7-26.4)                                             | 31.9 (30.3-33.5)                                             |
| Trimetoprim                 | 798 (2.5%)     | 0.16                                  | 6                                                              | 1.07                                           | 0.38                                    | 242.70 (214.04-274.13)                                      | 24.4 (20.5-28.4)                                             | 29.2 (24.7-33.7)                                             |
| Macrolides                  | 3,774 (11.9%)  | 0.36                                  | 8                                                              | 7.40                                           | 0.81                                    | 197.80 (187.80-208.20)                                      | 25.1 (23.3-27.0)                                             | 32.5 (30.3-34.8)                                             |

**Hyperkalemia event is defined as >5.5 mmol/L**

|                                                                     | <i>Number</i>                                | <i>Median years to first HK event</i> | <i>Median number of measurements before the first HK event</i> | <i>Total person-years of follow-up (1,000)</i> | <i>Median person-years of follow-up</i> | <i>Incidence rate of HK per 1,000 person-years (95% CI)</i> | <i>1-year cumulative incidence proportion of HK (95% CI)</i> | <i>3-year cumulative incidence proportion of HK (95% CI)</i> |                  |
|---------------------------------------------------------------------|----------------------------------------------|---------------------------------------|----------------------------------------------------------------|------------------------------------------------|-----------------------------------------|-------------------------------------------------------------|--------------------------------------------------------------|--------------------------------------------------------------|------------------|
| <b>Year of diagnosis</b>                                            | Total                                        | 31,649 (100%)                         | 0.61                                                           | 11                                             | 85.87                                   | 1.46                                                        | 72.48 (70.69-74.30)                                          | 11.2 (10.8-11.6)                                             | 15.3 (14.9-15.8) |
|                                                                     | 2000-2006                                    | 19,286 (60.9%)                        | 1.15                                                           | 13                                             | 65.67                                   | 1.94                                                        | 61.33 (59.45-63.26)                                          | 10.0 (9.5-10.4)                                              | 14.4 (13.8-15.0) |
|                                                                     | 2007-2012                                    | 12,363 (39.1%)                        | 0.19                                                           | 9                                              | 20.20                                   | 1.02                                                        | 108.73 (104.23-113.38)                                       | 13.2 (12.5-13.8)                                             | 16.8 (16.0-17.6) |
| <b>Sex</b>                                                          | Women                                        | 14,809 (46.8%)                        | 0.57                                                           | 11                                             | 38.86                                   | 1.33                                                        | 73.80 (71.12-76.55)                                          | 11.1 (10.6-11.7)                                             | 15.1 (14.5-15.8) |
|                                                                     | Men                                          | 16,840 (53.2%)                        | 0.64                                                           | 12                                             | 47.01                                   | 1.58                                                        | 71.39 (69.00-73.85)                                          | 11.3 (10.7-11.8)                                             | 15.5 (14.8-16.1) |
| <b>Age at diagnosis, years</b>                                      | Median (quartiles)                           | 78 (69.1-84.9)                        |                                                                |                                                |                                         |                                                             |                                                              |                                                              |                  |
|                                                                     | <18                                          | 80 (0.3%)                             | 0.08                                                           | 3                                              | 0.30                                    | 2.32                                                        | 83.16 (53.82-122.76)                                         | 26.3 (13.2-39.3)                                             | 31.3 (16.5-46.0) |
|                                                                     | 18-44                                        | 582 (1.8%)                            | 0.22                                                           | 12                                             | 2.61                                    | 3.64                                                        | 37.96 (30.85-46.21)                                          | 11.7 (8.7-14.6)                                              | 14.4 (11.1-17.8) |
|                                                                     | 45-59                                        | 2,851 (9.0%)                          | 0.81                                                           | 14                                             | 13.04                                   | 3.65                                                        | 39.42 (36.08-42.98)                                          | 9.3 (8.2-10.5)                                               | 13.0 (11.6-14.4) |
|                                                                     | 60-69                                        | 5,044 (15.9%)                         | 1.06                                                           | 15.5                                           | 19.02                                   | 2.75                                                        | 58.26 (54.88-61.79)                                          | 10.8 (9.8-11.7)                                              | 15.3 (14.2-16.5) |
|                                                                     | 70-79                                        | 9,376 (29.6%)                         | 0.84                                                           | 13                                             | 27.15                                   | 1.74                                                        | 75.37 (72.13-78.70)                                          | 11.7 (10.9-12.4)                                             | 16.2 (15.3-17.1) |
|                                                                     | >=80                                         | 13,716 (43.3%)                        | 0.34                                                           | 8                                              | 23.76                                   | 0.73                                                        | 102.37 (98.35-106.53)                                        | 11.3 (10.7-11.9)                                             | 15.1 (14.4-15.8) |
| <b>Lowest level of eGFR measured before hyperkalemia/index date</b> | No values below 60 mL/min/1.73m <sup>2</sup> | 7,679 (24.3%)                         | 1.13                                                           | 16                                             | 26.56                                   | 2.49                                                        | 42.73 (40.28-45.29)                                          | 7.1 (6.5-7.7)                                                | 10.7 (9.9-11.5)  |
|                                                                     | eGFR 45-59 mL/min/1.73m <sup>2</sup>         | 6,931 (21.9%)                         | 0.87                                                           | 13                                             | 19.93                                   | 1.74                                                        | 68.49 (64.90-72.22)                                          | 10.3 (9.5-11.1)                                              | 14.6 (13.7-15.6) |



**Hyperkalemia event is defined as >5.5 mmol/L**

|                                            | <i>Number</i>  | <i>Median years to first HK event</i> | <i>Median number of measurements before the first HK event</i> | <i>Total person-years of follow-up (1,000)</i> | <i>Median person-years of follow-up</i> | <i>Incidence rate of HK per 1,000 person-years (95% CI)</i> | <i>1-year cumulative incidence proportion of HK (95% CI)</i> | <i>3-year cumulative incidence proportion of HK (95% CI)</i> |
|--------------------------------------------|----------------|---------------------------------------|----------------------------------------------------------------|------------------------------------------------|-----------------------------------------|-------------------------------------------------------------|--------------------------------------------------------------|--------------------------------------------------------------|
| eGFR 30-44 mL/min/1.73m <sup>2</sup>       | 5,800 (18.3%)  | 0.47                                  | 11                                                             | 11.89                                          | 0.94                                    | 123.85 (117.60-130.34)                                      | 15.7 (14.6-16.8)                                             | 21.0 (19.6-22.3)                                             |
| eGFR 15-29 mL/min/1.73m <sup>2</sup>       | 3,707 (11.7%)  | 0.16                                  | 8                                                              | 5.02                                           | 0.38                                    | 234.43 (221.22-248.21)                                      | 23.3 (21.5-25.1)                                             | 29.4 (27.3-31.5)                                             |
| eGFR<15 mL/min/1.73m <sup>2</sup>          | 1,166 (3.7%)   | 0.08                                  | 8                                                              | 1.18                                           | 0.20                                    | 367.93 (334.09-404.28)                                      | 30.4 (26.6-34.2)                                             | 35.1 (30.9-39.3)                                             |
| Dialysis                                   | 298 (0.9%)     | 0.25                                  | 11                                                             | 0.28                                           | 0.33                                    | 465.87 (388.95-553.55)                                      | 32.6 (24.7-40.4)                                             | 41.3 (31.8-50.8)                                             |
| No eGFR measurement recorded               | 6,068 (19.2%)  | 4.29                                  | 12                                                             | 21.02                                          | 2.12                                    | 24.41 (22.34-26.62)                                         | 1.0 (0.8-1.3)                                                | 2.9 (2.5-3.3)                                                |
| <b>Conditions underlying heart failure</b> |                |                                       |                                                                |                                                |                                         |                                                             |                                                              |                                                              |
| Cardiomyopathy                             | 1,341 (4.2%)   | 0.79                                  | 13                                                             | 4.64                                           | 2.40                                    | 60.34 (53.48-67.83)                                         | 11.3 (9.4-13.2)                                              | 16.0 (13.6-18.3)                                             |
| Valvular heart disease                     | 4,262 (13.5%)  | 0.41                                  | 11                                                             | 9.76                                           | 1.07                                    | 98.35 (92.23-104.78)                                        | 14.1 (12.9-15.4)                                             | 18.5 (17.0-19.9)                                             |
| Myocardial infarction                      | 6,787 (21.4%)  | 0.65                                  | 12                                                             | 18.14                                          | 1.42                                    | 79.53 (75.48-83.75)                                         | 12.05 (11.17-12.93)                                          | 16.71 (15.64-17.77)                                          |
| Ischemic heart disease                     | 12,734 (40.2%) | 0.58                                  | 12                                                             | 34.65                                          | 1.43                                    | 76.05 (73.17-79.01)                                         | 11.9 (11.3-12.6)                                             | 16.3 (15.5-17.0)                                             |
| Atrial fibrillation                        | 11,094 (35.1%) | 0.61                                  | 12                                                             | 28.86                                          | 1.46                                    | 74.54 (71.42-77.76)                                         | 11.1 (10.4-11.8)                                             | 15.2 (14.4-16.0)                                             |
| <b>Other comorbidities</b>                 |                |                                       |                                                                |                                                |                                         |                                                             |                                                              |                                                              |
| Diabetes                                   | 6,076 (19.2%)  | 0.55                                  | 11                                                             | 13.28                                          | 1.06                                    | 127.39 (121.39-133.61)                                      | 16.5 (15.4-17.6)                                             | 22.5 (21.2-23.9)                                             |
| Chronic kidney disease                     | 12,995 (41.1%) | 0.31                                  | 10                                                             | 24.61                                          | 0.77                                    | 141.92 (137.25-146.70)                                      | 17.7 (16.9-18.5)                                             | 23.3 (22.4-24.3)                                             |
| Hypertension                               | 19,581 (61.9%) | 0.56                                  | 11                                                             | 49.27                                          | 1.33                                    | 86.38 (83.80-89.01)                                         | 12.7 (12.1-13.2)                                             | 17.4 (16.7-18.0)                                             |

**Hyperkalemia event is defined as >5.5 mmol/L**

|                                              | <i>Number</i> | <i>Median years to first HK event</i> | <i>Median number of measurements before the first HK event</i> | <i>Total person-years of follow-up (1,000)</i> | <i>Median person-years of follow-up</i> | <i>Incidence rate of HK per 1,000 person-years (95% CI)</i> | <i>1-year cumulative incidence proportion of HK (95% CI)</i> | <i>3-year cumulative incidence proportion of HK (95% CI)</i> |
|----------------------------------------------|---------------|---------------------------------------|----------------------------------------------------------------|------------------------------------------------|-----------------------------------------|-------------------------------------------------------------|--------------------------------------------------------------|--------------------------------------------------------------|
| Peripheral vascular disease                  | 3,673 (11.6%) | 0.41                                  | 11                                                             | 7.14                                           | 0.84                                    | 123.20 (115.19-131.61)                                      | 15.38 (14.00-16.76)                                          | 20.09 (18.47-21.71)                                          |
| Cerebrovascular disease                      | 5,489 (17.3%) | 0.47                                  | 11                                                             | 11.14                                          | 0.90                                    | 93.39 (87.80-99.24)                                         | 11.55 (10.59-12.51)                                          | 15.56 (14.42-16.69)                                          |
| Chronic pulmonary disease                    | 5,838 (18.4%) | 0.64                                  | 12                                                             | 12.61                                          | 1.06                                    | 99.52 (94.09-105.18)                                        | 12.35 (11.39-13.31)                                          | 17.37 (16.19-18.55)                                          |
| Peptic ulcer disease                         | 3,029 (9.6%)  | 0.48                                  | 11                                                             | 6.27                                           | 0.90                                    | 103.61 (95.80-111.89)                                       | 13.04 (11.66-14.42)                                          | 17.63 (15.98-19.28)                                          |
| Any malignant disease                        | 4,778 (15.1%) | 0.38                                  | 10                                                             | 8.49                                           | 0.69                                    | 108.75 (101.84-115.99)                                      | 12.4 (11.3-13.4)                                             | 16.4 (15.2-17.7)                                             |
| Alcoholism-related disorders                 | 2,420 (7.6%)  | 0.41                                  | 11                                                             | 5.79                                           | 1.20                                    | 95.07 (87.29-103.36)                                        | 14.0 (12.4-15.7)                                             | 18.9 (17.0-20.9)                                             |
| Medical obesity                              | 2,159 (6.8%)  | 0.92                                  | 15                                                             | 6.44                                           | 1.85                                    | 89.88 (82.71-97.51)                                         | 13.8 (12.1-15.5)                                             | 20.2 (18.1-22.3)                                             |
| <b>Drug treatment before first admission</b> |               |                                       |                                                                |                                                |                                         |                                                             |                                                              |                                                              |
| ACEis overall                                | 7,430 (23.5%) | 0.50                                  | 11                                                             | 17.94                                          | 1.36                                    | 92.24 (87.85-96.80)                                         | 13.4 (12.5-14.2)                                             | 18.1 (17.0-19.2)                                             |
| Ramipril                                     | 2,714 (8.6%)  | 0.35                                  | 10                                                             | 6.12                                           | 1.30                                    | 97.15 (89.50-105.28)                                        | 14.0 (12.5-15.5)                                             | 18.6 (16.8-20.4)                                             |
| Enalapril                                    | 2,077 (6.6%)  | 0.47                                  | 11                                                             | 4.66                                           | 1.24                                    | 107.41 (98.21-117.24)                                       | 14.8 (13.0-16.6)                                             | 20.2 (18.0-22.3)                                             |
| Other ACEis                                  | 2,271 (7.2%)  | 0.95                                  | 13                                                             | 6.50                                           | 1.70                                    | 73.73 (67.27-80.63)                                         | 10.7 (9.3-12.2)                                              | 15.4 (13.7-17.2)                                             |
| ACEis/diuretics combination                  | 731 (2.3%)    | 0.23                                  | 10                                                             | 1.56                                           | 1.35                                    | 109.06 (93.28-126.74)                                       | 16.0 (12.8-19.2)                                             | 20.5 (16.8-24.2)                                             |
| ARBs                                         | 3,403 (10.8%) | 0.44                                  | 11                                                             | 8.02                                           | 1.30                                    | 98.72 (91.96-105.84)                                        | 14.4 (13.0-15.8)                                             | 19.5 (17.9-21.2)                                             |
| Losartan                                     | 1,437 (4.5%)  | 0.42                                  | 12                                                             | 3.24                                           | 1.12                                    | 90.94 (80.86-101.93)                                        | 13.1 (11.1-15.1)                                             | 16.8 (14.5-19.1)                                             |
| Candesartan                                  | 579 (1.8%)    | 0.68                                  | 12                                                             | 1.45                                           | 1.78                                    | 120.62 (103.41-139.88)                                      | 17.1 (13.4-20.8)                                             | 25.6 (20.8-30.3)                                             |
| Other ARBs                                   | 512 (1.6%)    | 0.40                                  | 8.5                                                            | 1.33                                           | 1.73                                    | 102.10 (85.66-120.78)                                       | 16.6 (12.7-20.5)                                             | 23.0 (18.3-27.8)                                             |
| ARBs/diuretics combination                   | 1,129 (3.6%)  | 0.44                                  | 12                                                             | 2.59                                           | 1.25                                    | 95.59 (84.06-108.25)                                        | 13.8 (11.5-16.2)                                             | 18.4 (15.7-21.2)                                             |

**Hyperkalemia event is defined as >5.5 mmol/L**

|                       | <i>Number</i>  | <i>Median years to first HK event</i> | <i>Median number of measurements before the first HK event</i> | <i>Total person-years of follow-up (1,000)</i> | <i>Median person-years of follow-up</i> | <i>Incidence rate of HK per 1,000 person-years (95% CI)</i> | <i>1-year cumulative incidence proportion of HK (95% CI)</i> | <i>3-year cumulative incidence proportion of HK (95% CI)</i> |
|-----------------------|----------------|---------------------------------------|----------------------------------------------------------------|------------------------------------------------|-----------------------------------------|-------------------------------------------------------------|--------------------------------------------------------------|--------------------------------------------------------------|
| Beta-blockers         | 9,742 (30.8%)  | 0.51                                  | 11                                                             | 24.83                                          | 1.45                                    | 78.95 (75.49-82.52)                                         | 12.0 (11.3-12.8)                                             | 16.4 (15.5-17.3)                                             |
| Spironolactone        | 3,451 (10.9%)  | 0.43                                  | 10                                                             | 7.66                                           | 1.01                                    | 104.48 (97.36-111.97)                                       | 14.3 (12.9-15.6)                                             | 19.0 (17.4-20.6)                                             |
| Potassium supplements | 9,537 (30.1%)  | 0.48                                  | 11                                                             | 20.23                                          | 0.96                                    | 93.74 (89.57-98.06)                                         | 12.1 (11.4-12.9)                                             | 16.2 (15.3-17.1)                                             |
| Loop diuretics        | 12,484 (39.4%) | 0.48                                  | 11                                                             | 25.93                                          | 0.94                                    | 106.00 (102.07-110.04)                                      | 13.4 (12.7-14.1)                                             | 18.0 (17.2-18.9)                                             |
| NSAIDs                | 7,076 (22.4%)  | 0.62                                  | 11                                                             | 19.11                                          | 1.56                                    | 73.10 (69.32-77.04)                                         | 11.5 (10.7-12.3)                                             | 15.3 (14.3-16.3)                                             |
| Trimetoprim           | 798 (2.5%)     | 0.16                                  | 8                                                              | 1.27                                           | 0.65                                    | 107.33 (90.05-126.96)                                       | 12.2 (9.6-14.7)                                              | 14.8 (11.9-17.7)                                             |
| Macrolides            | 3,774 (11.9%)  | 0.60                                  | 12                                                             | 9.17                                           | 1.28                                    | 82.74 (76.96-88.85)                                         | 11.8 (10.6-12.9)                                             | 16.1 (14.7-17.5)                                             |

**Hyperkalemia event is defined as >6.0 mmol/L**

|                                                                     | <i>Number</i>  | <i>Median years to first HK event</i> | <i>Median number of measurements before the first HK event</i> | <i>Total person-years of follow-up (1,000)</i> | <i>Median person-years of follow-up</i> | <i>Incidence rate of HK per 1,000 person-years (95% CI)</i> | <i>1-year cumulative incidence proportion of HK (95% CI)</i> | <i>3-year cumulative incidence proportion of HK (95% CI)</i> |
|---------------------------------------------------------------------|----------------|---------------------------------------|----------------------------------------------------------------|------------------------------------------------|-----------------------------------------|-------------------------------------------------------------|--------------------------------------------------------------|--------------------------------------------------------------|
| <b>Total</b>                                                        | 31,649 (100%)  | 0.84                                  | 14                                                             | 92.43                                          | 1.73                                    | 31.74 (30.61-32.91)                                         | 4.9 (4.7-5.2)                                                | 7.0 (6.7-7.3)                                                |
| <b>Year of diagnosis</b>                                            |                |                                       |                                                                |                                                |                                         |                                                             |                                                              |                                                              |
| 2000-2006                                                           | 19,286 (60.9%) | 1.45                                  | 16                                                             | 70.65                                          | 2.30                                    | 26.93 (25.74-28.17)                                         | 4.3 (4.0-4.6)                                                | 6.4 (6.1-6.8)                                                |
| 2007-2012                                                           | 12,363 (39.1%) | 0.27                                  | 11                                                             | 21.77                                          | 1.21                                    | 47.35 (44.51-50.33)                                         | 5.9 (5.5-6.3)                                                | 7.8 (7.3-8.3)                                                |
| <b>Sex</b>                                                          |                |                                       |                                                                |                                                |                                         |                                                             |                                                              |                                                              |
| Women                                                               | 14,809 (46.8%) | 0.86                                  | 14                                                             | 41.80                                          | 1.59                                    | 32.80 (31.09-34.59)                                         | 4.9 (4.5-5.3)                                                | 6.9 (6.5-7.4)                                                |
| Men                                                                 | 16,840 (53.2%) | 0.83                                  | 14                                                             | 50.63                                          | 1.85                                    | 30.87 (29.36-32.44)                                         | 4.9 (4.6-5.3)                                                | 7.0 (6.6-7.4)                                                |
| <b>Age at diagnosis, years</b>                                      |                |                                       |                                                                |                                                |                                         |                                                             |                                                              |                                                              |
| Median (quartiles)                                                  | 78 (69.1-84.9) |                                       |                                                                |                                                |                                         |                                                             |                                                              |                                                              |
| <18                                                                 | 80 (0.3%)      | 0.05                                  | 1                                                              | 0.34                                           | 3.88                                    | 40.65 (22.22-68.20)                                         | 15.0 (5.8-24.2)                                              | 17.5 (7.4-27.6)                                              |
| 18-44                                                               | 582 (1.8%)     | 0.28                                  | 12.5                                                           | 2.77                                           | 4.07                                    | 18.79 (14.03-24.64)                                         | 6.0 (4.0-8.1)                                                | 7.6 (5.2-9.9)                                                |
| 45-59                                                               | 2,851 (9.0%)   | 1.22                                  | 20                                                             | 13.85                                          | 4.15                                    | 18.41 (16.22-20.81)                                         | 4.1 (3.4-4.9)                                                | 6.0 (5.1-6.9)                                                |
| 60-69                                                               | 5,044 (15.9%)  | 1.48                                  | 22                                                             | 20.55                                          | 3.16                                    | 26.66 (24.48-28.99)                                         | 4.8 (4.1-5.4)                                                | 7.2 (6.4-7.9)                                                |
| 70-79                                                               | 9,376 (29.6%)  | 1.03                                  | 16                                                             | 29.50                                          | 2.07                                    | 32.14 (30.12-34.25)                                         | 5.0 (4.5-5.4)                                                | 7.3 (6.7-7.8)                                                |
| >=80                                                                | 13,716 (43.3%) | 0.42                                  | 10                                                             | 25.41                                          | 0.86                                    | 43.96 (41.42-46.62)                                         | 5.0 (4.6-5.4)                                                | 6.8 (6.4-7.3)                                                |
| <b>Lowest level of eGFR measured before hyperkalemia/index date</b> |                |                                       |                                                                |                                                |                                         |                                                             |                                                              |                                                              |
| No values below 60 mL/min/1.73m <sup>2</sup>                        | 7,679 (24.3%)  | 1.50                                  | 20                                                             | 28.07                                          | 2.75                                    | 17.49 (15.98-19.11)                                         | 2.7 (2.3-3.1)                                                | 4.3 (3.9-4.8)                                                |
| eGFR 45-59 mL/min/1.73m <sup>2</sup>                                | 6,931 (21.9%)  | 1.30                                  | 16                                                             | 21.71                                          | 2.05                                    | 27.32 (25.16-29.61)                                         | 3.8 (3.4-4.3)                                                | 5.9 (5.3-6.5)                                                |

**Hyperkalemia event is defined as >6.0 mmol/L**

|                                            | <i>Number</i>  | <i>Median years to first HK event</i> | <i>Median number of measurements before the first HK event</i> | <i>Total person-years of follow-up (1,000)</i> | <i>Median person-years of follow-up</i> | <i>Incidence rate of HK per 1,000 person-years (95% CI)</i> | <i>1-year cumulative incidence proportion of HK (95% CI)</i> | <i>3-year cumulative incidence proportion of HK (95% CI)</i> |
|--------------------------------------------|----------------|---------------------------------------|----------------------------------------------------------------|------------------------------------------------|-----------------------------------------|-------------------------------------------------------------|--------------------------------------------------------------|--------------------------------------------------------------|
| eGFR 30-44 mL/min/1.73m <sup>2</sup>       | 5,800 (18.3%)  | 0.70                                  | 13                                                             | 13.38                                          | 1.23                                    | 51.43 (47.66-55.42)                                         | 6.7 (6.0-7.4)                                                | 9.3 (8.5-10.2)                                               |
| eGFR 15-29 mL/min/1.73m <sup>2</sup>       | 3,707 (11.7%)  | 0.22                                  | 9                                                              | 5.91                                           | 0.54                                    | 102.08 (94.09-110.56)                                       | 11.7 (10.5-12.9)                                             | 15.1 (13.7-16.4)                                             |
| eGFR<15 mL/min/1.73m <sup>2</sup>          | 1,166 (3.7%)   | 0.09                                  | 8                                                              | 1.45                                           | 0.31                                    | 161.19 (141.16-183.27)                                      | 15.7 (13.2-18.2)                                             | 18.6 (15.9-21.4)                                             |
| Dialysis                                   | 298 (0.9%)     | 0.38                                  | 14                                                             | 0.38                                           | 0.57                                    | 213.80 (169.79-265.73)                                      | 18.5 (13.1-23.9)                                             | 24.2 (17.8-30.6)                                             |
| No eGFR recorded                           | 6,068 (19.2%)  | 4.48                                  | 17                                                             | 21.54                                          | 2.16                                    | 11.38 (10.00-12.89)                                         | 0.4 (0.2-0.6)                                                | 1.3 (1.0-1.5)                                                |
| <b>Conditions underlying heart failure</b> |                |                                       |                                                                |                                                |                                         |                                                             |                                                              |                                                              |
| Cardiomyopathy                             | 1,341 (4.2%)   | 1.23                                  | 15                                                             | 4.96                                           | 2.69                                    | 25.99 (21.70-30.88)                                         | 4.4 (3.3-5.5)                                                | 7.3 (5.8-8.8)                                                |
| Valvular heart disease                     | 4,262 (13.5%)  | 0.59                                  | 13                                                             | 10.64                                          | 1.30                                    | 42.57 (38.74-46.68)                                         | 6.4 (5.6-7.2)                                                | 8.7 (7.8-9.7)                                                |
| Myocardial infarction                      | 6,787 (21.4%)  | 0.75                                  | 13                                                             | 19.63                                          | 1.72                                    | 34.74 (32.18-37.45)                                         | 5.55 (4.98-6.13)                                             | 7.59 (6.91-8.27)                                             |
| Ischemic heart disease                     | 12,734 (40.2%) | 0.77                                  | 14                                                             | 37.55                                          | 1.74                                    | 32.39 (30.59-34.26)                                         | 5.2 (4.8-5.6)                                                | 7.2 (6.7-7.7)                                                |
| Atrial fibrillation                        | 11,094 (35.1%) | 0.86                                  | 17                                                             | 31.08                                          | 1.72                                    | 31.79 (29.84-33.84)                                         | 4.7 (4.3-5.1)                                                | 6.7 (6.2-7.2)                                                |
| <b>Comorbidities</b>                       |                |                                       |                                                                |                                                |                                         |                                                             |                                                              |                                                              |
| Diabetes                                   | 6,076 (19.2%)  | 0.75                                  | 15                                                             | 14.85                                          | 1.34                                    | 59.25 (55.40-63.29)                                         | 8.0 (7.3-8.8)                                                | 11.4 (10.5-12.3)                                             |
| Chronic kidney disease                     | 12,995 (41.1%) | 0.47                                  | 13                                                             | 27.68                                          | 1.02                                    | 61.56 (58.67-64.55)                                         | 8.1 (7.6-8.6)                                                | 11.0 (10.4-11.6)                                             |
| Hypertension                               | 19,581 (61.9%) | 0.75                                  | 14                                                             | 53.42                                          | 1.61                                    | 38.41 (36.77-40.11)                                         | 5.7 (5.3-6.0)                                                | 8.1 (7.7-8.5)                                                |

**Hyperkalemia event is defined as >6.0 mmol/L**

|                                              | <i>Number</i> | <i>Median years to first HK event</i> | <i>Median number of measurements before the first HK event</i> | <i>Total person-years of follow-up (1,000)</i> | <i>Median person-years of follow-up</i> | <i>Incidence rate of HK per 1,000 person-years (95% CI)</i> | <i>1-year cumulative incidence proportion of HK (95% CI)</i> | <i>3-year cumulative incidence proportion of HK (95% CI)</i> |
|----------------------------------------------|---------------|---------------------------------------|----------------------------------------------------------------|------------------------------------------------|-----------------------------------------|-------------------------------------------------------------|--------------------------------------------------------------|--------------------------------------------------------------|
| Peripheral vascular disease                  | 3,673 (11.6%) | 0.54                                  | 15                                                             | 7.89                                           | 1.05                                    | 52.22 (47.30-57.51)                                         | 6.70 (5.83-7.56)                                             | 9.34 (8.30-10.38)                                            |
| Cerebrovascular disease                      | 5,489 (17.3%) | 0.59                                  | 13                                                             | 12.01                                          | 1.08                                    | 39.89 (36.40-43.63)                                         | 5.03 (4.42-5.64)                                             | 6.83 (6.12-7.55)                                             |
| Chronic pulmonary disease                    | 5,838 (18.4%) | 0.81                                  | 14                                                             | 13.71                                          | 1.25                                    | 43.26 (39.84-46.88)                                         | 5.55 (4.93-6.17)                                             | 7.85 (7.10-8.59)                                             |
| Peptic ulcer disease                         | 3,029 (9.6%)  | 0.59                                  | 14                                                             | 6.88                                           | 1.12                                    | 46.94 (41.96-52.34)                                         | 6.14 (5.23-7.05)                                             | 8.75 (7.65-9.85)                                             |
| Any malignant disease                        | 4,778 (15.1%) | 0.49                                  | 12.5                                                           | 9.17                                           | 0.82                                    | 49.96 (45.49-54.75)                                         | 5.7 (5.0-6.4)                                                | 7.9 (7.1-8.7)                                                |
| Alcoholism-related disorders                 | 2,420 (7.6%)  | 0.55                                  | 14                                                             | 6.33                                           | 1.51                                    | 46.11 (40.97-51.71)                                         | 7.2 (6.1-8.3)                                                | 9.7 (8.4-11.0)                                               |
| Medical obesity                              | 2,159 (6.8%)  | 1.08                                  | 21                                                             | 7.13                                           | 2.23                                    | 41.78 (37.17-46.81)                                         | 6.7 (5.5-7.8)                                                | 10.2 (8.8-11.7)                                              |
| <b>Drug treatment before first admission</b> |               |                                       |                                                                |                                                |                                         |                                                             |                                                              |                                                              |
| ACEis overall                                | 7,430 (23.5%) | 0.54                                  | 13                                                             | 19.51                                          | 1.65                                    | 41.72 (38.90-44.69)                                         | 6.4 (5.8-7.0)                                                | 8.7 (8.0-9.4)                                                |
| Ramipril                                     | 2,714 (8.6%)  | 0.44                                  | 12                                                             | 6.63                                           | 1.52                                    | 42.25 (37.44-47.49)                                         | 6.6 (5.6-7.6)                                                | 8.7 (7.5-9.8)                                                |
| Enalapril                                    | 2,077 (6.6%)  | 0.57                                  | 15                                                             | 5.13                                           | 1.52                                    | 49.74 (43.82-56.24)                                         | 7.0 (5.8-8.2)                                                | 9.9 (8.5-11.3)                                               |
| Other ACEis                                  | 2,271 (7.2%)  | 1.00                                  | 15                                                             | 7.04                                           | 2.03                                    | 33.25 (29.12-37.79)                                         | 5.2 (4.2-6.1)                                                | 7.2 (6.1-8.4)                                                |
| ACEis/diuretics combination                  | 731 (2.3%)    | 0.28                                  | 12                                                             | 1.72                                           | 1.62                                    | 50.45 (40.41-62.24)                                         | 7.8 (5.7-9.9)                                                | 10.3 (7.8-12.7)                                              |
| ARBs overall                                 | 3,403 (10.8%) | 0.63                                  | 14                                                             | 8.87                                           | 1.68                                    | 41.03 (36.92-45.47)                                         | 6.3 (5.4-7.1)                                                | 8.6 (7.6-9.7)                                                |
| Losartan                                     | 1,437 (4.5%)  | 0.42                                  | 14                                                             | 3.53                                           | 1.33                                    | 37.69 (31.56-44.67)                                         | 6.1 (4.7-7.4)                                                | 7.3 (5.9-8.8)                                                |
| Candesartan                                  | 579 (1.8%)    | 0.70                                  | 14                                                             | 1.67                                           | 2.19                                    | 47.87 (37.96-59.57)                                         | 7.6 (5.3-9.9)                                                | 11.4 (8.5-14.3)                                              |

**Hyperkalemia event is defined as >6.0 mmol/L**

|                            | <i>Number</i>  | <i>Median years to first HK event</i> | <i>Median number of measurements before the first HK event</i> | <i>Total person-years of follow-up (1,000)</i> | <i>Median person-years of follow-up</i> | <i>Incidence rate of HK per 1,000 person-years (95% CI)</i> | <i>1-year cumulative incidence proportion of HK (95% CI)</i> | <i>3-year cumulative incidence proportion of HK (95% CI)</i> |
|----------------------------|----------------|---------------------------------------|----------------------------------------------------------------|------------------------------------------------|-----------------------------------------|-------------------------------------------------------------|--------------------------------------------------------------|--------------------------------------------------------------|
| Other ARBs                 | 512 (1.6%)     | 0.96                                  | 15                                                             | 1.50                                           | 2.25                                    | 44.77 (34.70-56.86)                                         | 7.0 (4.6-9.4)                                                | 10.5 (7.6-13.5)                                              |
| ARBs/diuretics combination | 1,129 (3.6%)   | 0.70                                  | 14                                                             | 2.87                                           | 1.66                                    | 38.71 (31.85-46.62)                                         | 5.3 (3.9-6.7)                                                | 7.9 (6.2-9.6)                                                |
| Beta-blockers              | 9,742 (30.8%)  | 0.71                                  | 14                                                             | 26.71                                          | 1.74                                    | 34.86 (32.66-37.17)                                         | 5.3 (4.8-5.8)                                                | 7.5 (7.0-8.1)                                                |
| Spironolactone             | 3,451 (10.9%)  | 0.50                                  | 12                                                             | 8.38                                           | 1.30                                    | 46.45 (41.94-51.30)                                         | 6.6 (5.7-7.5)                                                | 9.4 (8.3-10.4)                                               |
| Potassium supplements      | 9,537 (30.1%)  | 0.56                                  | 13                                                             | 21.73                                          | 1.12                                    | 42.88 (40.17-45.72)                                         | 5.7 (5.2-6.2)                                                | 7.8 (7.2-8.4)                                                |
| Loop diuretics             | 12,484 (39.4%) | 0.56                                  | 13                                                             | 28.16                                          | 1.14                                    | 48.48 (45.94-51.12)                                         | 6.4 (5.9-6.9)                                                | 8.8 (8.2-9.3)                                                |
| NSAIDs                     | 7,076 (22.4%)  | 0.75                                  | 13                                                             | 20.51                                          | 1.81                                    | 32.03 (29.63-34.58)                                         | 5.1 (4.6-5.7)                                                | 7.1 (6.5-7.8)                                                |
| Trimetoprim                | 798 (2.5%)     | 0.17                                  | 10                                                             | 1.35                                           | 0.79                                    | 59.28 (47.00-73.77)                                         | 6.6 (4.8-8.5)                                                | 8.8 (6.6-10.9)                                               |
| Macrolides                 | 3,774 (11.9%)  | 0.72                                  | 15                                                             | 9.85                                           | 1.51                                    | 37.65 (33.91-41.68)                                         | 5.5 (4.7-6.3)                                                | 7.8 (6.9-8.7)                                                |

Abbreviations: ACEis, angiotensin-converting enzyme inhibitors; ARBs, angiotensin-receptor II blockers; CI, confidence interval; eGFR, estimated Glomerular Filtration Rate; HK, hyperkalemia; NSAIDs, non-steroidal anti-inflammatory drugs.

**Table S3. Prevalence and prevalence ratios (PR) for risk factors prior to the hyperkalemia/index date among heart failure patients with hyperkalemia versus matched comparison patients divided in moderate (>5.5 mmol/L) and severe (>6.0 mmol/L) hyperkalemia.**

|                                                                                    | <i>Patients with heart failure and hyperkalemia &gt;5.5 mmol/L</i> | <i>Matched comparisons without hyperkalemia*</i> | <i>PR (95% CI)</i> |
|------------------------------------------------------------------------------------|--------------------------------------------------------------------|--------------------------------------------------|--------------------|
| No. of patients                                                                    | 6,224 (100%)                                                       | 6,130 (100%)                                     |                    |
| Females                                                                            | 2,868 (46.1%)                                                      | 2,829 (46.2%)                                    |                    |
| Age, median (quartiles), y                                                         | 79 (70.9-85.2)                                                     | 79 (71.2-85.2)                                   |                    |
| K+ tests 6 mo. before HK/index date, median (quartiles)                            | 7.0 (2.0-13.0)                                                     | 2.0 (0.0-6.0)                                    |                    |
| Acute heart failure hospitalizations 6 mo. before HK/index date median (quartiles) | 0.0 (0.0-1.0)                                                      | 0.0 (0.0-0.0)                                    |                    |
| <b>Conditions underlying heart failure †</b>                                       |                                                                    |                                                  |                    |
| Cardiomyopathy                                                                     | 487 (7.8%)                                                         | 440 (7.2%)                                       | 1.09 (0.96-1.23)   |
| Valvular heart disease                                                             | 1,205 (19.4%)                                                      | 903 (14.7%)                                      | 1.31 (1.21-1.42)   |
| Myocardial infarction                                                              | 1,881 (30.2%)                                                      | 1,678 (27.4%)                                    | 1.10 (1.0-1.17)    |
| Any ischemic heart disease                                                         | 3,055 (49.1%)                                                      | 2,779 (45.3%)                                    | 1.08 (1.04-1.12)   |
| Atrial fibrillation                                                                | 2,536 (40.7%)                                                      | 2,359 (38.5%)                                    | 1.06 (1.01-1.11)   |
| <b>Lowest level of eGFR measured before hyperkalemia/index date</b>                |                                                                    |                                                  |                    |
| No values below 60 mL/min/1.73m <sup>2</sup>                                       | 507 (8.1%)                                                         | 1,195 (19.5%)                                    | 0.42 (0.38-0.46)   |
| eGFR 45-59 mL/min/1.73m <sup>2</sup>                                               | 855 (13.7%)                                                        | 1,449 (23.6%)                                    | 0.58 (0.54-0.63)   |
| eGFR 30-44 mL/min/1.73m <sup>2</sup>                                               | 1,708 (27.4%)                                                      | 1,428 (23.3%)                                    | 1.18 (1.11-1.25)   |
| eGFR 15-29 mL/min/1.73m <sup>2</sup>                                               | 2,127 (34.2%)                                                      | 922 (15.0%)                                      | 2.27 (2.12-2.43)   |
| eGFR<15 mL/min/1.73m <sup>2</sup>                                                  | 742 (11.9%)                                                        | 212 (3.5%)                                       | 3.45 (2.97-4.00)   |
| Dialysis                                                                           | 204 (3.3%)                                                         | 38 (0.6%)                                        | 5.29 (3.75-7.46)   |
| No eGFR recorded                                                                   | 81 (1.3%)                                                          | 886 (14.5%)                                      | 0.09 (0.07-0.11)   |
| <b>Selected risk factors for hyperkalemia</b>                                      |                                                                    |                                                  |                    |
| Diabetes                                                                           | 2,002 (32.2%)                                                      | 1,261 (20.6%)                                    | 1.56 (1.47-1.66)   |
| Chronic kidney disease ‡                                                           | 4,650 (74.7%)                                                      | 3,052 (49.8%)                                    | 1.50 (1.46-1.55)   |
| Hypertension                                                                       | 5,310 (85.3%)                                                      | 4,855 (79.2%)                                    | 1.08 (1.06-1.10)   |
| <b>Other comorbidities</b>                                                         |                                                                    |                                                  |                    |
| Peripheral vascular disease                                                        | 1,167 (18.8%)                                                      | 764 (12.5%)                                      | 1.50 (1.4-1.64)    |



|                                                            | <i>Patients with heart failure and hyperkalemia &gt;5.5 mmol/L</i> | <i>Matched comparisons without hyperkalemia*</i> | <i>PR (95% CI)</i> |
|------------------------------------------------------------|--------------------------------------------------------------------|--------------------------------------------------|--------------------|
| Cerebrovascular disease                                    | 1,335 (21.4%)                                                      | 1,187 (19.4%)                                    | 1.11 (1.0-1.19)    |
| Chronic pulmonary disease                                  | 1,856 (29.8%)                                                      | 1,463 (23.9%)                                    | 1.25 (1.2-1.33)    |
| Peptic ulcer disease                                       | 826 (13.3%)                                                        | 667 (10.9%)                                      | 1.22 (1.1-1.34)    |
| Any malignant disease                                      | 1,159 (18.6%)                                                      | 928 (15.1%)                                      | 1.23 (1.14-1.33)   |
| Alcoholism-related disorders                               | 673 (10.8%)                                                        | 496 (8.1%)                                       | 1.34 (1.20-1.49)   |
| Medical obesity                                            | 678 (10.9%)                                                        | 445 (7.3%)                                       | 1.50 (1.34-1.68)   |
| <b>Use of specific hyperkalemia-associated medications</b> |                                                                    |                                                  |                    |
| ACEis                                                      | 2,882 (46.3%)                                                      | 2,637 (43.0%)                                    | 1.08 (1.03-1.12)   |
| Ramipril                                                   | 1,416 (22.8%)                                                      | 1,223 (20.0%)                                    | 1.14 (1.07-1.22)   |
| Enalapril                                                  | 691 (11.1%)                                                        | 550 (9.0%)                                       | 1.24 (1.11-1.38)   |
| Other ACEis                                                | 783 (12.6%)                                                        | 846 (13.8%)                                      | 0.91 (0.83-1.00)   |
| ACEis/diuretics combination                                | 165 (2.7%)                                                         | 132 (2.2%)                                       | 1.23 (0.98-1.54)   |
| ARBs overall                                               | 972 (15.6%)                                                        | 908 (14.8%)                                      | 1.06 (0.98-1.15)   |
| Losartan                                                   | 430 (6.9%)                                                         | 433 (7.1%)                                       | 0.98 (0.86-1.11)   |
| Candesartan                                                | 230 (3.7%)                                                         | 189 (3.1%)                                       | 1.20 (0.99-1.45)   |
| Other ARBs                                                 | 165 (2.7%)                                                         | 137 (2.2%)                                       | 1.19 (0.95-1.48)   |
| ARBs/diuretics combination                                 | 229 (3.7%)                                                         | 242 (3.9%)                                       | 0.93 (0.78-1.11)   |
| Spironolactone                                             | 2,394 (38.5%)                                                      | 1,523 (24.8%)                                    | 1.55 (1.47-1.63)   |
| Potassium supplements                                      | 3,235 (52.0%)                                                      | 3,113 (50.8%)                                    | 1.02 (0.99-1.06)   |
| Loop diuretics                                             | 4,401 (70.7%)                                                      | 3,974 (64.8%)                                    | 1.09 (1.06-1.12)   |
| NSAIDs                                                     | 1,416 (22.8%)                                                      | 1,336 (21.8%)                                    | 1.04 (0.98-1.11)   |
| Trimetoprim                                                | 249 (4.0%)                                                         | 204 (3.3%)                                       | 1.20 (1.00-1.44)   |
| Macrolides                                                 | 883 (14.2%)                                                        | 709 (11.6%)                                      | 1.23 (1.12-1.35)   |

|                                                                                             | <i>Patients with<br/>heart failure and<br/>hyperkalemia &gt;6.0<br/>mmol/L</i> | <i>Matched<br/>comparisons<br/>without<br/>hyperkalemia*</i> | <i>PR (95% CI)</i> |
|---------------------------------------------------------------------------------------------|--------------------------------------------------------------------------------|--------------------------------------------------------------|--------------------|
| No. of patients                                                                             | 2,934 (100%)                                                                   | 2,891 (100%)                                                 |                    |
| Females                                                                                     | 1,371 (46.7%)                                                                  | 1,353 (46.8%)                                                |                    |
| Age, median (quartiles), y                                                                  | 79 (70.5-85.2)                                                                 | 79 (70.9-85.2)                                               |                    |
| K+ tests 6 mo. before HK/index<br>date, median (quartiles)                                  | 7.0 (3.0-15.0)                                                                 | 2.0 (0.0-5.0)                                                |                    |
| Acute heart failure<br>hospitalizations 6 mo. before<br>HK/index date median<br>(quartiles) | 0.0 (0.0-1.0)                                                                  | 0.0 (0.0-0.0)                                                |                    |
| <b>Conditions underlying<br/>heart failure †</b>                                            |                                                                                |                                                              |                    |
| Cardiomyopathy                                                                              | 236 (8.0%)                                                                     | 218 (7.5%)                                                   | 1.07 (0.89-1.27)   |
| Valvular heart disease                                                                      | 591 (20.1%)                                                                    | 441 (15.3%)                                                  | 1.32 (1.18-1.48)   |
| Myocardial infarction                                                                       | 896 (30.5%)                                                                    | 842 (29.1%)                                                  | 1.05 (1.00-1.13)   |
| Any ischemic heart disease                                                                  | 1,455 (49.6%)                                                                  | 1,355 (46.9%)                                                | 1.06 (1.00-1.12)   |
| Atrial fibrillation                                                                         | 1,227 (41.8%)                                                                  | 1,125 (38.9%)                                                | 1.07 (1.01-1.14)   |
| <b>Lowest level of eGFR<br/>measured before<br/>hyperkalemia/index<br/>date</b>             |                                                                                |                                                              |                    |
| No values below 60<br>mL/min/1.73m <sup>2</sup>                                             | 179 (6.1%)                                                                     | 526 (18.2%)                                                  | 0.34 (0.29-0.39)   |
| eGFR 45-59 mL/min/1.73m <sup>2</sup>                                                        | 291 (9.9%)                                                                     | 632 (21.9%)                                                  | 0.45 (0.40-0.52)   |
| eGFR 30-44 mL/min/1.73m <sup>2</sup>                                                        | 707 (24.1%)                                                                    | 725 (25.1%)                                                  | 0.96 (0.88-1.05)   |
| eGFR 15-29 mL/min/1.73m <sup>2</sup>                                                        | 1,102 (37.6%)                                                                  | 455 (15.7%)                                                  | 2.39 (2.17-2.63)   |
| eGFR<15 mL/min/1.73m <sup>2</sup>                                                           | 482 (16.4%)                                                                    | 115 (4.0%)                                                   | 4.13 (3.39-5.03)   |
| Dialysis                                                                                    | 144 (4.9%)                                                                     | 22 (0.8%)                                                    | 6.45 (4.13-10.07)  |
| No eGFR measurements<br>recorded                                                            | 29 (1.0%)                                                                      | 416 (14.4%)                                                  | 0.07 (0.05-0.10)   |
| <b>Selected risk factors<br/>for hyperkalemia</b>                                           |                                                                                |                                                              |                    |
| Diabetes                                                                                    | 1,039 (35.4%)                                                                  | 652 (22.6%)                                                  | 1.57 (1.44-1.71)   |
| Chronic kidney disease ‡                                                                    | 2,297 (78.3%)                                                                  | 1,480 (51.2%)                                                | 1.53 (1.47-1.59)   |
| Hypertension                                                                                | 2,562 (87.3%)                                                                  | 2,367 (81.9%)                                                | 1.07 (1.04-1.09)   |
| <b>Other comorbidities</b>                                                                  |                                                                                |                                                              |                    |
| Peripheral vascular disease                                                                 | 561 (19.1%)                                                                    | 391 (13.5%)                                                  | 1.41 (1.3-1.59)    |
| Cerebrovascular disease                                                                     | 629 (21.4%)                                                                    | 531 (18.4%)                                                  | 1.17 (1.1-1.29)    |
| Chronic pulmonary disease                                                                   | 901 (30.7%)                                                                    | 702 (24.3%)                                                  | 1.26 (1.2-1.38)    |
| Peptic ulcer disease                                                                        | 424 (14.5%)                                                                    | 307 (10.6%)                                                  | 1.36 (1.2-1.56)    |

|                                                            | <i>Patients with heart failure and hyperkalemia &gt;6.0 mmol/L</i> | <i>Matched comparisons without hyperkalemia*</i> | <i>PR (95% CI)</i> |                  |
|------------------------------------------------------------|--------------------------------------------------------------------|--------------------------------------------------|--------------------|------------------|
| <b>Use of specific hyperkalemia-associated medications</b> | Any malignant disease                                              | 591 (20.1%)                                      | 427 (14.8%)        | 1.36 (1.22-1.53) |
|                                                            | Alcoholism-related disorders                                       | 372 (12.7%)                                      | 245 (8.5%)         | 1.50 (1.28-1.74) |
|                                                            | Medical obesity                                                    | 371 (12.6%)                                      | 222 (7.7%)         | 1.65 (1.41-1.93) |
|                                                            | ACEis overall                                                      | 1,426 (48.6%)                                    | 1,246 (43.1%)      | 1.13 (1.07-1.19) |
|                                                            | Ramipril                                                           | 693 (23.6%)                                      | 614 (21.2%)        | 1.11 (1.01-1.22) |
|                                                            | Enalapril                                                          | 369 (12.6%)                                      | 243 (8.4%)         | 1.50 (1.28-1.74) |
|                                                            | Other ACEis                                                        | 363 (12.4%)                                      | 382 (13.2%)        | 0.94 (0.82-1.07) |
|                                                            | ACEis/diuretics combination                                        | 83 (2.8%)                                        | 58 (2.0%)          | 1.41 (1.01-1.96) |
|                                                            | ARBs overall                                                       | 459 (15.6%)                                      | 450 (15.6%)        | 1.01 (0.89-1.13) |
|                                                            | Losartan                                                           | 206 (7.0%)                                       | 220 (7.6%)         | 0.92 (0.77-1.11) |
|                                                            | Candesartan                                                        | 108 (3.7%)                                       | 83 (2.9%)          | 1.28 (0.97-1.70) |
|                                                            | Other ARBs                                                         | 81 (2.8%)                                        | 71 (2.5%)          | 1.12 (0.82-1.54) |
|                                                            | ARBs/diuretics combination                                         | 97 (3.3%)                                        | 124 (4.3%)         | 0.77 (0.59-1.00) |
|                                                            | Spironolactone                                                     | 1,200 (40.9%)                                    | 712 (24.6%)        | 1.66 (1.54-1.79) |
|                                                            | Potassium supplements                                              | 1,586 (54.1%)                                    | 1,420 (49.1%)      | 1.10 (1.05-1.16) |
|                                                            | Loop diuretics                                                     | 2,170 (74.0%)                                    | 1,837 (63.5%)      | 1.16 (1.12-1.21) |
|                                                            | NSAIDs                                                             | 672 (22.9%)                                      | 646 (22.3%)        | 1.03 (0.93-1.13) |
|                                                            | Trimetoprim                                                        | 134 (4.6%)                                       | 95 (3.3%)          | 1.39 (1.07-1.80) |
|                                                            | Macrolides                                                         | 456 (15.5%)                                      | 332 (11.5%)        | 1.35 (1.19-1.54) |

\* Heart failure comparison patients without hyperkalemia matched on age, sex, and duration of heart failure on the hyperkalemia/index date

† As present at the time of heart failure diagnosis.

‡ Manifest chronic kidney disease was defined on the date of the second of two measurements more than 90 days apart of a creatinine value corresponding to an eGFR below 60 mL/min/1.73m<sup>2</sup>, or on the first date of a hospital diagnosis of chronic kidney disease, see text and Supplementary material with codes

Abbreviations: ACEis, angiotensin-converting enzyme inhibitors; ARBs, angiotensin-receptor II blockers; CI, confidence interval; eGFR, estimated Glomerular Filtration Rate; NSAIDs, non-steroidal anti-inflammatory drugs. PR, prevalence ratio

**Table S4. Hazard ratios for clinical outcomes 6 months after hyperkalemia (HK) versus fully matched comparisons without HK separate for moderate and (>5.5 mmol/L) and severe (>6.0 mmol/L) HK**

|                                   | Heart failure patients with first HK >5.5 mmol/L | Matched* heart failure comparisons without HK |                                       |                                                        |
|-----------------------------------|--------------------------------------------------|-----------------------------------------------|---------------------------------------|--------------------------------------------------------|
| Outcome                           | n (Rate per 1,000 person-y)                      | n (Rate per 1,000 person-y)                   | Fully adjusted† Hazard Ratio (95% CI) | Prior-event-rate-ratio adjusted‡ Hazard Ratio (95% CI) |
| Any hospital outpatient contact   | 3,975 (4,051.21)                                 | 3,170 (1,645.62)                              | 2.03 (1.92-2.14)                      | 1.57 (1.48-1.67)                                       |
| Any acute hospitalization         | 5,117 (7,257.35)                                 | 2,484 (1,183.59)                              | 3.92 (3.71-4.14)                      | 2.83 (2.67-3.01)                                       |
| Any non-acute hospitalization     | 1,331 (856.24)                                   | 887 (344.90)                                  | 2.35 (2.14-2.59)                      | 1.74 (1.55-1.93)                                       |
| Any cardiac diagnosis             | 4,128 (4,219.94)                                 | 2,006 (900.10)                                | 3.40 (3.20-3.61)                      | 2.65 (2.49-2.81)                                       |
| Ventricular arrhythmia            | 218 (116.89)                                     | 118 (42.12)                                   | 2.84 (2.21-3.65)                      | 2.34 (1.77-3.24)                                       |
| Cardiac arrest                    | 104 (54.41)                                      | 15 (5.30)                                     | 11.53 (6.44-20.63)                    | 13.70 (4.02-49.62)                                     |
| Dialysis procedure                | 201 (107.35)                                     | 28 (9.90)                                     | 2.83 (1.86-4.29)                      | 1.28 (0.78-2.06)                                       |
| Ventilator treatment              | 657 (363.37)                                     | 94 (33.35)                                    | 11.82 (9.38-14.90)                    | 6.16 (4.28-9.10)                                       |
| ICU admission                     | 1,146 (679.53)                                   | 247 (88.79)                                   | 7.55 (6.50-8.77)                      | 4.74 (3.80-5.99)                                       |
| Heart failure re-admission        | 2,840 (2,176.16)                                 | 1,467 (623.56)                                | 2.84 (2.64-3.05)                      | 2.37 (2.20-2.53)                                       |
| ACEi prescription                 | 1,867 (1,460.69)                                 | 2,461 (1,298.93)                              | 0.98 (0.91-1.05)                      | 0.90 (0.86-0.95)                                       |
| ARB prescription                  | 547 (312.83)                                     | 780 (305.61)                                  | 0.79 (0.70-0.89)                      | 0.93 (0.85-1.01)                                       |
| Spironolactone prescription       | 1,332 (885.95)                                   | 1,494 (641.90)                                | 0.87 (0.80-0.94)                      | 0.70 (0.66-0.75)                                       |
| Potassium supplement prescription | 1,674 (1,170.86)                                 | 2,909 (1,625.12)                              | 0.77 (0.72-0.82)                      | 0.66 (0.63-0.70)                                       |
| Death                             | 2,887 (1,500.55)                                 | 747 (263.52)                                  | 4.93 (4.51-5.38)                      | -                                                      |

|                                   | Heart failure patients with first HK >6.0 mmol/L | Matched* heart failure comparisons without HK |                                       |                                              |
|-----------------------------------|--------------------------------------------------|-----------------------------------------------|---------------------------------------|----------------------------------------------|
| Outcome                           | n (Rate per 1,000 person-y)                      | n (Rate per 1,000 person-y)                   | Fully adjusted† Hazard Ratio (95% CI) | Prior-event-rate-ratio adjusted Hazard Ratio |
| Any hospital outpatient contact   | 1,932 (5,256.27)                                 | 1,437 (1,559.45)                              | 2.61 (2.40-2.83)                      | 1.96 (1.78-2.14)                             |
| Any acute hospitalization         | 2,603 (12,392.70)                                | 1,108 (1,085.77)                              | 5.95 (5.47-6.47)                      | 3.68 (3.35-4.02)                             |
| Any non-acute hospitalization     | 579 (920.35)                                     | 390 (317.48)                                  | 2.75 (2.36-3.20)                      | 1.86 (1.53-2.15)                             |
| Any cardiac diagnosis             | 2,078 (5,994.61)                                 | 887 (821.60)                                  | 4.76 (4.34-5.22)                      | 3.12 (2.85-3.44)                             |
| Ventricular arrhythmia            | 122 (163.11)                                     | 44 (33.14)                                    | 5.06 (3.41-7.49)                      | 3.29 (2.04-5.32)                             |
| Cardiac arrest                    | 58 (75.05)                                       | 8 (5.98)                                      | 13.45 (5.99-30.19)                    | 10.00 (1.36-57.21)                           |
| Dialysis procedure                | 136 (183.48)                                     | 12 (8.97)                                     | 4.59 (2.40-8.78)                      | 2.13 (1.05-4.72)                             |
| Ventilator treatment              | 323 (440.36)                                     | 36 (27.01)                                    | 18.51 (12.74-26.88)                   | 5.64 (3.19-9.89)                             |
| ICU admission                     | 613 (925.15)                                     | 99 (75.17)                                    | 12.79 (10.10-16.19)                   | 4.44 (3.12-6.11)                             |
| Heart failure re-admission        | 1,402 (2,750.84)                                 | 624 (546.13)                                  | 3.86 (3.46-4.31)                      | 2.88 (2.59-3.21)                             |
| ACEi prescription                 | 723 (1,342.91)                                   | 1,162 (1,302.98)                              | 0.78 (0.70-0.87)                      | 0.78 (0.72-0.85)                             |
| ARB prescription                  | 209 (292.88)                                     | 395 (329.42)                                  | 0.63 (0.52-0.77)                      | 0.87 (0.76-0.99)                             |
| Spironolactone prescription       | 508 (808.87)                                     | 679 (611.97)                                  | 0.70 (0.61-0.80)                      | 0.63 (0.57-0.70)                             |
| Potassium supplement prescription | 691 (1,162.62)                                   | 1,327 (1,536.74)                              | 0.75 (0.67-0.83)                      | 0.64 (0.58-0.69)                             |
| Death                             | 1,608 (2,064.20)                                 | 344 (256.73)                                  | 6.87 (6.03-7.84)                      | -                                            |

\* Heart failure comparisons without HK individually matched to heart failure patients with HK on age, sex, and heart failure duration, see text.

† Adjusted for age, sex, and heart failure duration by matched design, and, by Cox regression analyses, for heart failure treatment regimen, number of acute heart failure hospitalizations 6 months before the HK/index date, eGFR category, Charlson Comorbidity Index score, presence of diabetes/chronic kidney disease/ hypertension, use of ACEis/ARBs, spironolactone, or potassium supplements

‡ The prior-event-rate-ratio adjusted hazard ratio is the ratio of the two age, sex, and heart failure duration matched rate ratios observed 6 months after vs. 6 months before the HK/index date, see text

**Table S5. Chronic heart failure: Baseline characteristics among patients with first hospital diagnosed heart failure, stratified by eGFR category and subsequent incidence of hyperkalemia.**

|                                                           | eGFR category (mL/min/1.73m2)* |                |                |                |                |                | Dialysis       | No eGFR recorded | Total |
|-----------------------------------------------------------|--------------------------------|----------------|----------------|----------------|----------------|----------------|----------------|------------------|-------|
|                                                           | eGFR≥ 60                       | eGFR 45-59     | eGFR 30-44     | eGFR 15-29     | eGFR<15        |                |                |                  |       |
| Number of HF patients (row %)                             | 2,194 (23.5%)                  | 2,232 (23.9%)  | 2,043 (21.9%)  | 1,466 (15.7%)  | 436 (4.7%)     | 160 (1.7%)     | 796 (8.5%)     | 9,327 (100%)     |       |
| Female                                                    | 529 (24.1%)                    | 766 (34.3%)    | 885 (43.3%)    | 711 (48.5%)    | 225 (51.6%)    | 56 (35.0%)     | 340 (42.7%)    | 3,512 (37.7%)    |       |
| Median age (quartiles)                                    | 64 (55.9-72.8)                 | 71 (63.1-78.6) | 77 (69.3-82.7) | 79 (71.8-84.9) | 78 (69.3-83.6) | 69 (58.9-77.2) | 76 (66.5-82.1) | 73 (63.6-80.8)   |       |
| Echocardiography performed before / at first HF admission | 2,194 (100%)                   | 2,232 (100%)   | 2,043 (100%)   | 1,466 (100%)   | 436 (100%)     | 160 (100%)     | 796 (100%)     | 9,327 (100%)     |       |
| Heart failure as primary diagnosis                        | 920 (41.9%)                    | 992 (44.4%)    | 874 (42.8%)    | 596 (40.7%)    | 179 (41.1%)    | 68 (42.5%)     | 386 (48.5%)    | 4,015 (43.0%)    |       |
| <b>Conditions underlying heart failure †</b>              |                                |                |                |                |                |                |                |                  |       |
| Cardiomyopathy                                            | 455 (20.7%)                    | 373 (16.7%)    | 260 (12.7%)    | 152 (10.4%)    | 38 (8.7%)      | 11 (6.9%)      | 98 (12.3%)     | 1,387 (14.9%)    |       |
| Valvular heart disease                                    | 289 (13.2%)                    | 376 (16.8%)    | 443 (21.7%)    | 366 (25.0%)    | 93 (21.3%)     | 27 (16.9%)     | 122 (15.3%)    | 1,716 (18.4%)    |       |
| Myocardial infarction                                     | 829 (37.8%)                    | 889 (39.8%)    | 871 (42.6%)    | 625 (42.6%)    | 183 (42.0%)    | 70 (43.8%)     | 238 (29.9%)    | 3,705 (39.7%)    |       |
| Any ischemic heart disease                                | 1,246 (56.8%)                  | 1,289 (57.8%)  | 1,267 (62.0%)  | 935 (63.8%)    | 270 (61.9%)    | 110 (68.8%)    | 386 (48.5%)    | 5,503 (59.0%)    |       |
| Atrial fibrillation                                       | 807 (36.8%)                    | 991 (44.4%)    | 985 (48.2%)    | 701 (47.8%)    | 204 (46.8%)    | 52 (32.5%)     | 370 (46.5%)    | 4,110 (44.1%)    |       |
| <b>Other comorbidities</b>                                |                                |                |                |                |                |                |                |                  |       |
| Diabetes                                                  | 441 (20.1%)                    | 450 (20.2%)    | 504 (24.7%)    | 460 (31.4%)    | 184 (42.2%)    | 72 (45.0%)     | 161 (20.2%)    | 2,272 (24.4%)    |       |
| Chronic kidney disease <sup>‡</sup>                       | 20 (0.9%)                      | 957 (42.9%)    | 1,390 (68.0%)  | 1,179 (80.4%)  | 377 (86.5%)    | 160 (100%)     | 46 (5.8%)      | 4,129 (44.3%)    |       |
| Hypertension                                              | 2,194 (100%)                   | 2,232 (100%)   | 2,043 (100%)   | 1,466 (100%)   | 436 (100%)     | 160 (100%)     | 796 (8.5%)     | 9,327 (100%)     |       |
| Peripheral vascular disease                               | 191 (8.7%)                     | 258 (11.6%)    | 329 (16.1%)    | 294 (20.1%)    | 110 (25.2%)    | 62 (38.8%)     | 85 (10.7%)     | 1,329 (14.2%)    |       |

eGFR category (mL/min/1.73m2)\*

|                                               | eGFR≥ 60      | eGFR 45-59    | eGFR 30-44    | eGFR 15-29    | eGFR<15     | Dialysis    | No eGFR recorded | Total         |
|-----------------------------------------------|---------------|---------------|---------------|---------------|-------------|-------------|------------------|---------------|
| Cerebrovascular disease                       | 255 (11.6%)   | 346 (15.5%)   | 416 (20.4%)   | 347 (23.7%)   | 132 (30.3%) | 40 (25.0%)  | 125 (15.7%)      | 1,661 (17.8%) |
| Chronic pulmonary disease                     | 340 (15.5%)   | 405 (18.1%)   | 392 (19.2%)   | 358 (24.4%)   | 113 (25.9%) | 26 (16.3%)  | 115 (14.4%)      | 1,749 (18.8%) |
| Peptic ulcer disease                          | 143 (6.5%)    | 177 (7.9%)    | 184 (9.0%)    | 216 (14.7%)   | 60 (13.8%)  | 31 (19.4%)  | 64 (8.0%)        | 875 (9.4%)    |
| Any malignant disease                         | 168 (7.7%)    | 279 (12.5%)   | 328 (16.1%)   | 257 (17.5%)   | 73 (16.7%)  | 30 (18.8%)  | 80 (10.1%)       | 1,215 (13.0%) |
| Alcoholism-related disorders                  | 241 (11.0%)   | 189 (8.5%)    | 176 (8.6%)    | 157 (10.7%)   | 56 (12.8%)  | 23 (14.4%)  | 66 (8.3%)        | 908 (9.7%)    |
| Medical obesity                               | 229 (10.4%)   | 192 (8.6%)    | 179 (8.8%)    | 142 (9.7%)    | 61 (14.0%)  | 20 (12.5%)  | 49 (6.2%)        | 872 (9.3%)    |
| <b>Drug treatment, before first admission</b> |               |               |               |               |             |             |                  |               |
| ACEis overall                                 | 1,948 (88.8%) | 1,925 (86.2%) | 1,633 (79.9%) | 1,102 (75.2%) | 288 (66.1%) | 104 (65.0%) | 668 (83.9%)      | 7,668 (82.2%) |
| Ramipril                                      | 1,094 (49.9%) | 1,134 (50.8%) | 900 (44.1%)   | 579 (39.5%)   | 156 (35.8%) | 60 (37.5%)  | 126 (15.8%)      | 4,049 (43.4%) |
| Enalapril                                     | 293 (13.4%)   | 306 (13.7%)   | 301 (14.7%)   | 245 (16.7%)   | 75 (17.2%)  | 20 (12.5%)  | 118 (14.8%)      | 1,358 (14.6%) |
| Other ACEis                                   | 621 (28.3%)   | 530 (23.7%)   | 481 (23.5%)   | 305 (20.8%)   | 75 (17.2%)  | 28 (17.5%)  | 451 (56.7%)      | 2,491 (26.7%) |
| ACEis/diuretics combination                   | 71 (3.2%)     | 90 (4.0%)     | 103 (5.0%)    | 90 (6.1%)     | 26 (6.0%)   | 1 (0.6%)    | 16 (2.0%)        | 397 (4.3%)    |
| ARBs overall                                  | 438 (20.0%)   | 476 (21.3%)   | 529 (25.9%)   | 376 (25.6%)   | 142 (32.6%) | 53 (33.1%)  | 161 (20.2%)      | 2,175 (23.3%) |
| Losartan                                      | 243 (11.1%)   | 246 (11.0%)   | 262 (12.8%)   | 169 (11.5%)   | 73 (16.7%)  | 27 (16.9%)  | 81 (10.2%)       | 1,101 (11.8%) |
| Candesartan                                   | 88 (4.0%)     | 110 (4.9%)    | 111 (5.4%)    | 56 (3.8%)     | 36 (8.3%)   | 24 (15.0%)  | 25 (3.1%)        | 450 (4.8%)    |
| Other ARBs                                    | 54 (2.5%)     | 57 (2.6%)     | 82 (4.0%)     | 61 (4.2%)     | 18 (4.1%)   | 5 (3.1%)    | 30 (3.8%)        | 307 (3.3%)    |
| ARBs/diuretics combination                    | 102 (4.6%)    | 112 (5.0%)    | 139 (6.8%)    | 139 (9.5%)    | 32 (7.3%)   | 3 (1.9%)    | 44 (5.5%)        | 571 (6.1%)    |
| Beta-blockers                                 | 2,116 (96.4%) | 2,136 (95.7%) | 1,927 (94.3%) | 1,376 (93.9%) | 408 (93.6%) | 151 (94.4%) | 754 (94.7%)      | 8,868 (95.1%) |
| Spirolactone                                  | 871 (39.7%)   | 1,000 (44.8%) | 920 (45.0%)   | 655 (44.7%)   | 182 (41.7%) | 19 (11.9%)  | 389 (48.9%)      | 4,036 (43.3%) |
| Potassium supplements                         | 1,154 (52.6%) | 1,402 (62.8%) | 1,458 (71.4%) | 1,096 (74.8%) | 314 (72.0%) | 58 (36.3%)  | 541 (68.0%)      | 6,023 (64.6%) |

|                                          |                                                    | eGFR category (mL/min/1.73m2)* |                        |                        |                        |                        |                        |                     |                        |
|------------------------------------------|----------------------------------------------------|--------------------------------|------------------------|------------------------|------------------------|------------------------|------------------------|---------------------|------------------------|
|                                          |                                                    | eGFR ≥ 60                      | eGFR 45-59             | eGFR 30-44             | eGFR 15-29             | eGFR <15               | Dialysis               | No eGFR recorded    | Total                  |
|                                          | Loop diuretics                                     | 1,463 (66.7%)                  | 1,744 (78.1%)          | 1,796 (87.9%)          | 1,384 (94.4%)          | 419 (96.1%)            | 135 (84.4%)            | 686 (86.2%)         | 7,627 (81.8%)          |
|                                          | NSAIDs                                             | 520 (23.7%)                    | 503 (22.5%)            | 482 (23.6%)            | 374 (25.5%)            | 114 (26.1%)            | 24 (15.0%)             | 209 (26.3%)         | 2,226 (23.9%)          |
|                                          | Trimetroprim                                       | 23 (1.0%)                      | 50 (2.2%)              | 66 (3.2%)              | 71 (4.8%)              | 23 (5.3%)              | 2 (1.3%)               | 28 (3.5%)           | 263 (2.8%)             |
|                                          | Macrolides                                         | 254 (11.6%)                    | 337 (15.1%)            | 304 (14.9%)            | 227 (15.5%)            | 68 (15.6%)             | 27 (16.9%)             | 106 (13.3%)         | 1,323 (14.2%)          |
| <b>Hyperkalemia event &gt;5.0 mmol/L</b> |                                                    |                                |                        |                        |                        |                        |                        |                     |                        |
|                                          | Total number of events                             | 495 (22.6%)                    | 719 (32.2%)            | 842 (41.2%)            | 659 (45.0%)            | 203 (46.6%)            | 101 (63.1%)            | 257 (32.3%)         | 3,276 (35.1%)          |
|                                          | Median years to event in pts with event            | 1.59                           | 1.10                   | 0.96                   | 0.65                   | 0.52                   | 0.39                   | 3.48                | 1.02                   |
|                                          | Median no. K+ tests before the event               | 7                              | 5                      | 5                      | 6                      | 8                      | 5                      | 7                   | 6                      |
|                                          | 1-year cumulative incidence, % (95% CI)            | 8.7 (7.4-9.9)                  | 15.2 (13.5-17.0)       | 21.3 (19.1-23.6)       | 27.9 (24.7-31.1)       | 32.1 (25.7-38.6)       | 48.1 (33.2-63.0)       | 3.8 (2.4-5.1)       | 17.4 (16.5-18.3)       |
|                                          | Incidence rate of HK / 1,000 person-years (95% CI) | 67.98 (62.12-74.24)            | 111.96 (103.93-120.46) | 175.34 (163.69-187.59) | 252.03 (233.15-272.03) | 320.99 (278.35-368.31) | 615.89 (501.66-748.37) | 74.97 (66.09-84.72) | 129.26 (124.87-133.76) |
| <b>Hyperkalemia event &gt;5.5 mmol/L</b> |                                                    |                                |                        |                        |                        |                        |                        |                     |                        |
|                                          | Total number of events                             | 169 (7.7%)                     | 293 (13.1%)            | 395 (19.3%)            | 366 (25.0%)            | 112 (25.7%)            | 78 (48.8%)             | 119 (14.9%)         | 1,532 (16.4%)          |
|                                          | Median years to event in pts with event            | 2.39                           | 1.86                   | 1.53                   | 1.01                   | 0.84                   | 0.54                   | 3.48                | 1.48                   |
|                                          | Median no. K+ tests before the event               | 15                             | 11                     | 11                     | 10                     | 13                     | 9                      | 10                  | 11                     |
|                                          | 1-year cumulative incidence, % (95% CI)            | 2.0 (1.4-2.6)                  | 4.4 (3.5-5.3)          | 7.5 (6.3-8.8)          | 12.4 (10.5-14.3)       | 14.0 (10.2-17.8)       | 33.1 (22.2-44.0)       | 1.4 (0.6-2.2)       | 6.5 (5.9-7.0)          |
|                                          | Incidence rate of HK / 1,000 person-years (95% CI) | 20.74 (17.74-24.12)            | 37.49 (33.32-42.04)    | 65.03 (58.77-71.77)    | 110.77 (99.71-122.72)  | 137.80 (113.46-165.81) | 356.04 (281.43-444.35) | 31.65 (26.22-37.87) | 50.84 (48.33-53.45)    |
| <b>Hyperkalemia event &gt;6.0 mmol/L</b> |                                                    |                                |                        |                        |                        |                        |                        |                     |                        |
|                                          | Total number of events                             | 76 (3.5%)                      | 119 (5.3%)             | 167 (8.2%)             | 156 (10.6%)            | 60 (13.8%)             | 50 (31.3%)             | 57 (7.2%)           | 685 (7.3%)             |



|                                                    | eGFR category (mL/min/1.73m2)* |                     |                     |                     |                     |                        |                     | No eGFR recorded    | Total |
|----------------------------------------------------|--------------------------------|---------------------|---------------------|---------------------|---------------------|------------------------|---------------------|---------------------|-------|
|                                                    | eGFR ≥ 60                      | eGFR 45-59          | eGFR 30-44          | eGFR 15-29          | eGFR <15            | Dialysis               |                     |                     |       |
| Median years to event in pts with event            | 2.57                           | 2.14                | 1.53                | 1.26                | 1.02                | 0.74                   | 3.79                | 1.67                |       |
| Median no. K+ tests before the event               | 18                             | 18                  | 13                  | 13                  | 18                  | 13                     | 13                  | 14                  |       |
| 1-year cumulative incidence, % (95% CI)            | 0.5 (0.2-0.9)                  | 1.7 (1.2-2.2)       | 3.1 (2.4-3.9)       | 4.6 (3.5-5.8)       | 6.9 (4.3-9.4)       | 18.8 (11.3-26.2)       | 0.8 (0.1-1.4)       | 2.7 (2.3-3.0)       |       |
| Incidence rate of HK / 1,000 person-years (95% CI) | 9.07 (7.15-11.35)              | 14.39 (11.92-17.22) | 25.43 (21.72-29.59) | 43.03 (36.54-50.34) | 65.02 (49.62-83.70) | 174.49 (129.51-230.04) | 14.74 (11.17-19.10) | 21.46 (19.88-23.13) |       |

\* Patients categorized according to lowest measured eGFR before or on admission date with heart failure; presence of dialysis overrules any eGFR measurement result.

† Conditions possibly underlying heart failure; hierarchical categorization: presence before/at first heart failure diagnosis of 1) cardiomyopathy (with or without any of the following diagnoses); 2) valvular heart disease (with or without any of the other diagnoses except cardiomyopathy); 3) myocardial infarction (with or without atrial fibrillation); 4) atrial fibrillation only; and 5) none of these diagnoses.

‡ Manifest chronic kidney disease was defined on the date of the second of two measurements more than 90 days apart of a creatinine value corresponding to an eGFR below 60 mL/min/1.73m2, or on the first date of a hospital diagnosis of chronic kidney disease.

Abbreviations: ACEis, angiotensin-converting enzyme inhibitors; ARBs, angiotensin-receptor II blockers; CI, confidence interval; eGFR, estimated Glomerular Filtration Rate; HK, hyperkalemia; NSAIDs, non-steroidal anti-inflammatory drugs.

**Table S6. Chronic heart failure: Prevalence of risk factors at time of hyperkalemia/index date among heart failure patients and matched comparisons without hyperkalemia**

|                                                                                    | <i>Heart failure patients with first hyperkalemia &gt;5.0 mmol/L</i> | <i>Matched heart failure comparisons without hyperkalemia*</i> | <i>Matched prevalence ratio (95% CI)</i> |
|------------------------------------------------------------------------------------|----------------------------------------------------------------------|----------------------------------------------------------------|------------------------------------------|
| No. of patients                                                                    | 3,276 (100%)                                                         | 3,094 (100%)                                                   | 1.00 (1.00-1.00)                         |
| Females                                                                            | 1,247 (38.1%)                                                        | 1,154 (37.3%)                                                  | 1.02 (0.96-1.09)                         |
| Age, median (quartiles), y                                                         | 76 (68.1-82.9)                                                       | 76 (68.6-82.6)                                                 |                                          |
| K+ tests 6 mo. before HK/index date, median (quartiles)                            | 4.0 (1.0-9.0)                                                        | 1.0 (0.0-3.0)                                                  |                                          |
| Acute heart failure hospitalizations 6 mo. before HK/index date median (quartiles) | 0.0 (0.0-0.0)                                                        | 0.0 (0.0-0.0)                                                  |                                          |
| <b>Conditions underlying heart failure †</b>                                       |                                                                      |                                                                |                                          |
| Cardiomyopathy                                                                     | 507 (15.5%)                                                          | 439 (14.2%)                                                    | 1.09 (0.97-1.23)                         |
| Valvular heart disease                                                             | 713 (21.8%)                                                          | 639 (20.7%)                                                    | 1.05 (0.96-1.16)                         |
| Myocardial infarction                                                              | 1,407 (42.9%)                                                        | 1,257 (40.6%)                                                  | 1.06 (1.0-1.12)                          |
| Any ischemic heart disease                                                         | 2,138 (65.3%)                                                        | 1,919 (62.0%)                                                  | 1.05 (1.01-1.09)                         |
| Atrial fibrillation                                                                | 1,578 (48.2%)                                                        | 1,466 (47.4%)                                                  | 1.02 (0.97-1.07)                         |
| <b>Lowest level of eGFR measured before hyperkalemia/index date</b>                |                                                                      |                                                                |                                          |
| No value below 60 mL/min/1.73m <sup>2</sup>                                        | 319 (9.7%)                                                           | 617 (19.9%)                                                    | 0.49 (0.43-0.55)                         |
| eGFR 45-59 mL/min/1.73m <sup>2</sup>                                               | 613 (18.7%)                                                          | 798 (25.8%)                                                    | 0.73 (0.66-0.80)                         |
| eGFR 30-44 mL/min/1.73m <sup>2</sup>                                               | 987 (30.1%)                                                          | 801 (25.9%)                                                    | 1.16 (1.08-1.26)                         |
| eGFR 15-29 mL/min/1.73m <sup>2</sup>                                               | 941 (28.7%)                                                          | 546 (17.6%)                                                    | 1.63 (1.48-1.79)                         |
| eGFR<15 mL/min/1.73m <sup>2</sup>                                                  | 265 (8.1%)                                                           | 123 (4.0%)                                                     | 2.03 (1.65-2.51)                         |
| Dialysis                                                                           | 122 (3.7%)                                                           | 25 (0.8%)                                                      | 4.61 (3.01-7.07)                         |
| No eGFR measurement recorded                                                       | 29 (0.9%)                                                            | 184 (5.9%)                                                     | 0.15 (0.10-0.22)                         |
| <b>Selected risk factors for hyperkalemia</b>                                      |                                                                      |                                                                |                                          |
| Diabetes                                                                           | 1,146 (35.0%)                                                        | 704 (22.8%)                                                    | 1.54 (1.42-1.67)                         |
| Chronic kidney disease ‡                                                           | 2,414 (73.7%)                                                        | 1,716 (55.5%)                                                  | 1.33 (1.28-1.38)                         |
| Hypertension                                                                       | 3,276 (100%)                                                         | 3,094 (100%)                                                   | 1.00 (1.00-1.00)                         |
| <b>Other comorbidities</b>                                                         |                                                                      |                                                                |                                          |

|                                                            | <i>Heart failure patients with first hyperkalemia &gt;5.0 mmol/L</i> | <i>Matched heart failure comparisons without hyperkalemia*</i> | <i>Matched prevalence ratio (95% CI)</i> |
|------------------------------------------------------------|----------------------------------------------------------------------|----------------------------------------------------------------|------------------------------------------|
| Peripheral vascular disease                                | 718 (21.9%)                                                          | 467 (15.1%)                                                    | 1.45 (1.30-1.61)                         |
| Cerebrovascular disease                                    | 706 (21.6%)                                                          | 587 (19.0%)                                                    | 1.14 (1.0-1.25)                          |
| Chronic pulmonary disease                                  | 835 (25.5%)                                                          | 580 (18.7%)                                                    | 1.36 (1.2-1.49)                          |
| Peptic ulcer disease                                       | 426 (13.0%)                                                          | 296 (9.6%)                                                     | 1.36 (1.2-1.56)                          |
| Any malignant disease                                      | 538 (16.4%)                                                          | 435 (14.1%)                                                    | 1.17 (1.04-1.31)                         |
| Alcoholism-related disorders                               | 364 (11.1%)                                                          | 230 (7.4%)                                                     | 1.49 (1.28-1.75)                         |
| Medical obesity                                            | 341 (10.4%)                                                          | 242 (7.8%)                                                     | 1.33 (1.14-1.56)                         |
| <b>Use of specific hyperkalemia-associated medications</b> |                                                                      |                                                                |                                          |
| ACEis                                                      | 2,384 (72.8%)                                                        | 2,152 (69.6%)                                                  | 1.05 (1.01-1.08)                         |
| Ramipril                                                   | 1,240 (37.9%)                                                        | 1,064 (34.4%)                                                  | 1.10 (1.03-1.18)                         |
| Enalapril                                                  | 487 (14.9%)                                                          | 377 (12.2%)                                                    | 1.22 (1.08-1.38)                         |
| Other ACEis                                                | 729 (22.3%)                                                          | 728 (23.5%)                                                    | 0.95 (0.86-1.03)                         |
| ACEis/diuretics combination                                | 84 (2.6%)                                                            | 91 (2.9%)                                                      | 0.87 (0.65-1.17)                         |
| ARBs                                                       | 702 (21.4%)                                                          | 678 (21.9%)                                                    | 0.98 (0.89-1.07)                         |
| Losartan                                                   | 317 (9.7%)                                                           | 341 (11.0%)                                                    | 0.88 (0.76-1.01)                         |
| Candesartan                                                | 194 (5.9%)                                                           | 138 (4.5%)                                                     | 1.33 (1.07-1.64)                         |
| Other ARBs                                                 | 117 (3.6%)                                                           | 111 (3.6%)                                                     | 1.00 (0.77-1.28)                         |
| ARBs/diuretics combination                                 | 125 (3.8%)                                                           | 149 (4.8%)                                                     | 0.79 (0.63-1.00)                         |
| Spironolactone                                             | 1,728 (52.7%)                                                        | 1,168 (37.8%)                                                  | 1.40 (1.32-1.48)                         |
| Potassium supplements                                      | 1,875 (57.2%)                                                        | 1,618 (52.3%)                                                  | 1.09 (1.05-1.14)                         |
| Loop diuretics                                             | 2,738 (83.6%)                                                        | 2,270 (73.4%)                                                  | 1.14 (1.11-1.17)                         |
| NSAIDs                                                     | 709 (21.6%)                                                          | 610 (19.7%)                                                    | 1.10 (1.00-1.21)                         |
| Trimetoprim                                                | 131 (4.0%)                                                           | 84 (2.7%)                                                      | 1.47 (1.12-1.93)                         |
| Macrolides                                                 | 473 (14.4%)                                                          | 320 (10.3%)                                                    | 1.40 (1.22-1.59)                         |

\* Heart failure comparison patients without hyperkalemia matched on age, sex, and duration of heart failure on the hyperkalemia/index date

† As present at the time of heart failure diagnosis.

‡ Manifest CKD was defined on the date of the second of two measurements more than 90 days apart of a creatinine value corresponding to an eGFR below 60 mL/min/1.73m<sup>2</sup>, or on the first date of a hospital diagnosis of chronic kidney disease, see text and Supplementary material with codes

Abbreviations: ACEis, angiotensin-converting enzyme inhibitors; ARBs, angiotensin-receptor II blockers; CI, confidence interval; eGFR, estimated Glomerular Filtration Rate; NSAIDs, non-steroidal anti-inflammatory drugs; PR, prevalence ratio

**Table S7. Chronic heart failure. Hazard ratios for clinical outcomes 6 months after hyperkalemia (HK) versus fully matched comparisons without HK.**

|                                   | Heart failure patients with first HK >5.0 mmol/L | Matched* heart failure comparisons without HK |                                       |                                                       |
|-----------------------------------|--------------------------------------------------|-----------------------------------------------|---------------------------------------|-------------------------------------------------------|
| Outcome                           | n (Rate per 1,000 person-y)                      | n (Rate per 1,000 person-y)                   | Fully adjusted† Hazard Ratio (95% CI) | Prior-event-rate-ratio adjusted Hazard Ratio (95% CI) |
| Any hospital outpatient contact   | 2,246 (3,091.43)                                 | 1,448 (1,312.78)                              | 1.98 (1.85-2.13)                      | 1.50 (1.37-1.64)                                      |
| Any acute hospitalization         | 1,967 (2,499.73)                                 | 678 (506.10)                                  | 3.72 (3.39-4.08)                      | 2.10 (1.87-2.37)                                      |
| Any non-acute hospitalization     | 745 (659.76)                                     | 298 (208.70)                                  | 2.74 (2.38-3.16)                      | 1.98 (1.67-2.35)                                      |
| Any cardiac diagnosis             | 1,498 (1,604.57)                                 | 449 (320.60)                                  | 3.85 (3.45-4.31)                      | 2.21 (1.92-2.55)                                      |
| Ventricular arrhythmia            | 110 (83.26)                                      | 25 (16.67)                                    | 4.06 (2.58-6.41)                      | 2.07 (1.18-3.80)                                      |
| Cardiac arrest                    | 32 (23.68)                                       | 5 (3.32)                                      | 7.29 (2.70-19.70)                     | 7.23 (0.00-378E6)                                     |
| Dialysis procedure                | 94 (70.86)                                       | 11 (7.32)                                     | 3.44 (1.53-7.78)                      | 2.29 (1.24-4.27)                                      |
| Ventilator treatment              | 174 (131.55)                                     | 26 (17.29)                                    | 7.26 (4.73-11.16)                     | 2.62 (0.94-6.28)                                      |
| ICU admission                     | 413 (326.52)                                     | 58 (38.72)                                    | 8.01 (6.02-10.66)                     | 4.85 (3.25-7.57)                                      |
| Heart failure re-admission        | 761 (661.07)                                     | 170 (115.99)                                  | 4.27 (3.58-5.08)                      | 2.10 (1.72-2.56)                                      |
| ACEi prescription                 | 1,781 (2,582.50)                                 | 1,819 (2,289.60)                              | 1.02 (0.95-1.09)                      | 0.96 (0.92-1.00)                                      |
| ARB prescription                  | 506 (430.54)                                     | 599 (465.76)                                  | 0.93 (0.82-1.06)                      | 0.96 (0.90-1.03)                                      |
| Spironolactone prescription       | 1,122 (1,155.93)                                 | 896 (751.44)                                  | 1.01 (0.92-1.10)                      | 0.86 (0.81-0.92)                                      |
| Potassium supplement prescription | 1,128 (1,137.80)                                 | 1,287 (1,238.69)                              | 0.84 (0.77-0.91)                      | 0.80 (0.75-0.85)                                      |
| Death                             | 773 (570.99)                                     | 162 (107.61)                                  | 4.76 (3.98-5.69)                      | -                                                     |

\* Heart failure comparisons without HK individually matched to heart failure patients with HK on age, sex, and heart failure duration, see text.

† Adjusted for age, sex, and heart failure duration by matched design, and, by Cox regression analyses, for heart failure treatment regimen, number of acute heart failure hospitalizations 6 months before the HK/index date, eGFR category, Charlson Comorbidity Index score, presence of diabetes/chronic kidney disease/ hypertension, use of ACEis/ARBs, spironolactone, or potassium supplements

‡ The prior-event-rate-ratio adjusted hazard ratio is the ratio of the two age, sex, and heart failure duration matched rate ratios observed 6 months after vs. 6 months before the HK/index date, see text

**Table S8. Restricted analysis to patients with 5 K+ tests: Baseline characteristics among patients with first hospital diagnosed heart failure, stratified by eGFR category and subsequent incidence of hyperkalemia.**

|                                                           | eGFR category (mL/min/1.73m2)* |                |                |                |                |                | Dialysis       | No eGFR recorded | Total |
|-----------------------------------------------------------|--------------------------------|----------------|----------------|----------------|----------------|----------------|----------------|------------------|-------|
|                                                           | eGFR>= 60                      | eGFR 45-59     | eGFR 30-44     | eGFR 15-29     | eGFR<15        |                |                |                  |       |
| Number of HF patients (row %)                             | 5,824 (28.5%)                  | 5,401 (26.4%)  | 4,568 (22.3%)  | 3,008 (14.7%)  | 961 (4.7%)     | 215 (1.1%)     | 479 (2.3%)     | 20,456 (100%)    |       |
| Female                                                    | 1,931 (33.2%)                  | 2,513 (46.5%)  | 2,513 (55.0%)  | 1,628 (54.1%)  | 505 (52.5%)    | 67 (31.2%)     | 202 (42.2%)    | 9,359 (45.8%)    |       |
| Median age (quartiles)                                    | 70 (60.4-78.7)                 | 78 (69.5-83.9) | 81 (74.2-86.6) | 82 (75.6-87.2) | 81 (72.6-85.8) | 69 (60.2-78.7) | 72 (62.0-79.1) | 77 (68.1-84.3)   |       |
| Echocardiography performed before / at first HF admission | 4,030 (69.2%)                  | 3,509 (65.0%)  | 2,835 (62.1%)  | 1,936 (64.4%)  | 636 (66.2%)    | 176 (81.9%)    | 285 (59.5%)    | 13,407 (65.5%)   |       |
| Heart failure as primary diagnosis                        | 2,345 (40.3%)                  | 2,083 (38.6%)  | 1,687 (36.9%)  | 1,022 (34.0%)  | 321 (33.4%)    | 93 (43.3%)     | 188 (39.2%)    | 7,739 (37.8%)    |       |
| <b>Conditions underlying heart failure †</b>              |                                |                |                |                |                |                |                |                  |       |
| Cardiomyopathy                                            | 393 (6.7%)                     | 250 (4.6%)     | 161 (3.5%)     | 110 (3.7%)     | 21 (2.2%)      | 9 (4.2%)       | 20 (4.2%)      | 964 (4.7%)       |       |
| Valvular heart disease                                    | 676 (11.6%)                    | 766 (14.2%)    | 766 (16.8%)    | 523 (17.4%)    | 167 (17.4%)    | 40 (18.6%)     | 94 (19.6%)     | 3,032 (14.8%)    |       |
| Myocardial infarction                                     | 1,083 (18.6%)                  | 1,141 (21.1%)  | 1,106 (24.2%)  | 817 (27.2%)    | 260 (27.1%)    | 76 (35.3%)     | 92 (19.2%)     | 4,575 (22.4%)    |       |
| Any ischemic heart disease                                | 2,062 (35.4%)                  | 2,209 (40.9%)  | 2,010 (44.0%)  | 1,445 (48.0%)  | 437 (45.5%)    | 119 (55.3%)    | 202 (42.2%)    | 8,484 (41.5%)    |       |
| Atrial fibrillation                                       | 1,902 (32.7%)                  | 2,103 (38.9%)  | 1,817 (39.8%)  | 1,171 (38.9%)  | 349 (36.3%)    | 57 (26.5%)     | 124 (25.9%)    | 7,523 (36.8%)    |       |
| <b>Other comorbidities</b>                                |                                |                |                |                |                |                |                |                  |       |
| Diabetes                                                  | 962 (16.5%)                    | 943 (17.5%)    | 1,005 (22.0%)  | 857 (28.5%)    | 319 (33.2%)    | 82 (38.1%)     | 83 (17.3%)     | 4,251 (20.8%)    |       |
| Chronic kidney disease‡                                   | 33 (0.6%)                      | 2,803 (51.9%)  | 3,659 (80.1%)  | 2,653 (88.2%)  | 890 (92.6%)    | 215 (100%)     | 18 (3.8%)      | 10,271 (50.2%)   |       |
| Hypertension                                              | 2,916 (50.1%)                  | 3,432 (63.5%)  | 3,367 (73.7%)  | 2,439 (81.1%)  | 800 (83.2%)    | 200 (93.0%)    | 214 (44.7%)    | 13,368 (65.4%)   |       |
| Peripheral vascular disease                               | 436 (7.5%)                     | 586 (10.8%)    | 590 (12.9%)    | 547 (18.2%)    | 222 (23.1%)    | 70 (32.6%)     | 46 (9.6%)      | 2,497 (12.2%)    |       |

eGFR category (mL/min/1.73m2)\*

|                                               | eGFR≥ 60      | eGFR 45-59    | eGFR 30-44    | eGFR 15-29    | eGFR<15     | Dialysis    | No eGFR recorded | Total         |
|-----------------------------------------------|---------------|---------------|---------------|---------------|-------------|-------------|------------------|---------------|
| Cerebrovascular disease                       | 691 (11.9%)   | 870 (16.1%)   | 946 (20.7%)   | 707 (23.5%)   | 243 (25.3%) | 45 (20.9%)  | 41 (8.6%)        | 3,543 (17.3%) |
| Chronic pulmonary disease                     | 999 (17.2%)   | 1,005 (18.6%) | 915 (20.0%)   | 615 (20.4%)   | 178 (18.5%) | 42 (19.5%)  | 59 (12.3%)       | 3,813 (18.6%) |
| Peptic ulcer disease                          | 385 (6.6%)    | 452 (8.4%)    | 498 (10.9%)   | 402 (13.4%)   | 151 (15.7%) | 41 (19.1%)  | 33 (6.9%)        | 1,962 (9.6%)  |
| Any malignant disease                         | 667 (11.5%)   | 811 (15.0%)   | 804 (17.6%)   | 596 (19.8%)   | 190 (19.8%) | 44 (20.5%)  | 37 (7.7%)        | 3,149 (15.4%) |
| Alcoholism-related disorders                  | 623 (10.7%)   | 343 (6.4%)    | 300 (6.6%)    | 267 (8.9%)    | 109 (11.3%) | 34 (15.8%)  | 28 (5.8%)        | 1,704 (8.3%)  |
| Medical obesity                               | 457 (7.8%)    | 351 (6.5%)    | 313 (6.9%)    | 267 (8.9%)    | 109 (11.3%) | 16 (7.4%)   | 26 (5.4%)        | 1,539 (7.5%)  |
| <b>Drug treatment, before first admission</b> |               |               |               |               |             |             |                  |               |
| ACEis overall                                 | 1,125 (19.3%) | 1,260 (23.3%) | 1,235 (27.0%) | 933 (31.0%)   | 304 (31.6%) | 71 (33.0%)  | 102 (21.3%)      | 5,030 (24.6%) |
| Ramipril                                      | 434 (7.5%)    | 498 (9.2%)    | 457 (10.0%)   | 361 (12.0%)   | 109 (11.3%) | 34 (15.8%)  | 21 (4.4%)        | 1,914 (9.4%)  |
| Enalapril                                     | 332 (5.7%)    | 373 (6.9%)    | 373 (8.2%)    | 277 (9.2%)    | 95 (9.9%)   | 24 (11.2%)  | 24 (5.0%)        | 1,498 (7.3%)  |
| Other ACEis                                   | 284 (4.9%)    | 306 (5.7%)    | 329 (7.2%)    | 247 (8.2%)    | 73 (7.6%)   | 12 (5.6%)   | 53 (11.1%)       | 1,304 (6.4%)  |
| ACEis/diuretics combination                   | 132 (2.3%)    | 146 (2.7%)    | 141 (3.1%)    | 105 (3.5%)    | 45 (4.7%)   | 4 (1.9%)    | 8 (1.7%)         | 581 (2.8%)    |
| ARBs overall                                  | 485 (8.3%)    | 579 (10.7%)   | 614 (13.4%)   | 509 (16.9%)   | 195 (20.3%) | 48 (22.3%)  | 35 (7.3%)        | 2,465 (12.1%) |
| Losartan                                      | 204 (3.5%)    | 235 (4.4%)    | 251 (5.5%)    | 205 (6.8%)    | 86 (8.9%)   | 17 (7.9%)   | 15 (3.1%)        | 1,013 (5.0%)  |
| Candesartan                                   | 85 (1.5%)     | 104 (1.9%)    | 99 (2.2%)     | 79 (2.6%)     | 37 (3.9%)   | 22 (10.2%)  | 5 (1.0%)         | 431 (2.1%)    |
| Other ARBs                                    | 72 (1.2%)     | 91 (1.7%)     | 96 (2.1%)     | 73 (2.4%)     | 26 (2.7%)   | 9 (4.2%)    | 10 (2.1%)        | 377 (1.8%)    |
| ARBs/diuretics combination                    | 173 (3.0%)    | 192 (3.6%)    | 205 (4.5%)    | 193 (6.4%)    | 59 (6.1%)   | 5 (2.3%)    | 6 (1.3%)         | 833 (4.1%)    |
| Beta-blockers                                 | 1,429 (24.5%) | 1,626 (30.1%) | 1,570 (34.4%) | 1,241 (41.3%) | 418 (43.5%) | 132 (61.4%) | 122 (25.5%)      | 6,538 (32.0%) |
| Spironolactone                                | 361 (6.2%)    | 455 (8.4%)    | 599 (13.1%)   | 510 (17.0%)   | 167 (17.4%) | 4 (1.9%)    | 49 (10.2%)       | 2,145 (10.5%) |
| Potassium supplements                         | 1,064 (18.3%) | 1,452 (26.9%) | 1,583 (34.7%) | 1,259 (41.9%) | 378 (39.3%) | 49 (22.8%)  | 143 (29.9%)      | 5,928 (29.0%) |
| Loop diuretics                                | 1,380 (23.7%) | 1,815 (33.6%) | 2,002 (43.8%) | 1,794 (59.6%) | 622 (64.7%) | 142 (66.0%) | 190 (39.7%)      | 7,945 (38.8%) |

|                                                    | eGFR category (mL/min/1.73m2)* |                     |                        |                        |                        |                        |                     | No eGFR recorded    | Total |
|----------------------------------------------------|--------------------------------|---------------------|------------------------|------------------------|------------------------|------------------------|---------------------|---------------------|-------|
|                                                    | eGFR ≥ 60                      | eGFR 45-59          | eGFR 30-44             | eGFR 15-29             | eGFR <15               | Dialysis               |                     |                     |       |
| NSAIDs                                             | 1,276 (21.9%)                  | 1,169 (21.6%)       | 996 (21.8%)            | 734 (24.4%)            | 237 (24.7%)            | 19 (8.8%)              | 122 (25.5%)         | 4,553 (22.3%)       |       |
| Trimetoprim                                        | 62 (1.1%)                      | 114 (2.1%)          | 136 (3.0%)             | 129 (4.3%)             | 49 (5.1%)              | 3 (1.4%)               | 5 (1.0%)            | 498 (2.4%)          |       |
| Macrolides                                         | 723 (12.4%)                    | 641 (11.9%)         | 507 (11.1%)            | 382 (12.7%)            | 119 (12.4%)            | 30 (14.0%)             | 57 (11.9%)          | 2,459 (12.0%)       |       |
| <b>Hyperkalemia event &gt;5.0 mmol/L</b>           |                                |                     |                        |                        |                        |                        |                     |                     |       |
| Total number of events                             | 785 (13.5%)                    | 956 (17.7%)         | 1,080 (23.6%)          | 950 (31.6%)            | 338 (35.2%)            | 91 (42.3%)             | 84 (17.5%)          | 4,284 (20.9%)       |       |
| Median years to event in pts with event            | 0.11                           | 0.10                | 0.09                   | 0.04                   | 0.03                   | 0.12                   | 0.29                | 0.08                |       |
| Median no. K+ tests before the event               | 2                              | 2                   | 2                      | 1                      | 1                      | 1                      | 1                   | 2                   |       |
| 1-year cumulative incidence, % (95% CI)            | 13.5 (12.5-14.5)               | 17.7 (16.5-18.9)    | 23.6 (22.0-25.3)       | 31.6 (29.2-34.0)       | 35.2 (30.5-39.8)       | 42.3 (30.9-53.8)       | 17.5 (13.4-21.7)    | 20.9 (20.2-21.6)    |       |
| Incidence rate of HK / 1,000 person-years (95% CI) | 40.48 (37.70-43.41)            | 61.94 (58.07-65.99) | 110.99 (104.47-117.81) | 213.88 (200.50-227.93) | 295.93 (265.22-329.22) | 414.30 (333.57-508.67) | 38.92 (31.05-48.19) | 81.57 (79.14-84.05) |       |
| <b>Hyperkalemia event &gt;5.5 mmol/L</b>           |                                |                     |                        |                        |                        |                        |                     |                     |       |
| Total number of events                             | 192 (3.3%)                     | 272 (5.0%)          | 396 (8.7%)             | 400 (13.3%)            | 151 (15.7%)            | 52 (24.2%)             | 33 (6.9%)           | 1,496 (7.3%)        |       |
| Median years to event in pts with event            | 0.11                           | 0.10                | 0.10                   | 0.04                   | 0.02                   | 0.22                   | 0.30                | 0.08                |       |
| Median no. K+ tests before the event               | 2                              | 2                   | 2                      | 1                      | 1                      | 2                      | 1                   | 2                   |       |
| 1-year cumulative incidence, % (95% CI)            | 3.3 (2.8-3.8)                  | 5.0 (4.4-5.7)       | 8.7 (7.8-9.6)          | 13.3 (11.9-14.7)       | 15.7 (13.0-18.4)       | 24.2 (16.6-31.7)       | 6.9 (4.5-9.3)       | 7.3 (6.9-7.7)       |       |
| Incidence rate of HK / 1,000 person-years (95% CI) | 9.01 (7.78-10.37)              | 15.62 (13.82-17.59) | 35.33 (31.94-38.99)    | 73.89 (66.83-81.50)    | 105.90 (89.68-124.20)  | 179.54 (134.09-235.44) | 13.96 (9.61-19.60)  | 25.17 (23.91-26.48) |       |
| <b>Hyperkalemia event &gt;6.0 mmol/L</b>           |                                |                     |                        |                        |                        |                        |                     |                     |       |
| Total number of events                             | 58 (1.0%)                      | 99 (1.8%)           | 142 (3.1%)             | 167 (5.6%)             | 72 (7.5%)              | 20 (9.3%)              | 9 (1.9%)            | 567 (2.8%)          |       |
| Median years to event in pts with event            | 0.12                           | 0.12                | 0.10                   | 0.06                   | 0.01                   | 0.25                   | 0.17                | 0.09                |       |

|                                                    | eGFR category (mL/min/1.73m2)* |                  |                     |                     |                     |                     |                  | No eGFR recorded  | Total |
|----------------------------------------------------|--------------------------------|------------------|---------------------|---------------------|---------------------|---------------------|------------------|-------------------|-------|
|                                                    | eGFR ≥ 60                      | eGFR 45-59       | eGFR 30-44          | eGFR 15-29          | eGFR <15            | Dialysis            |                  |                   |       |
| Median no. K+ tests before the event               | 2                              | 3                | 2                   | 2                   | 1                   | 2                   | 1                | 2                 |       |
| 1-year cumulative incidence, % (95% CI)            | 1.0 (0.7-1.3)                  | 1.8 (1.5-2.2)    | 3.1 (2.6-3.6)       | 5.6 (4.7-6.4)       | 7.5 (5.7-9.3)       | 9.3 (5.0-13.6)      | 1.9 (0.6-3.1)    | 2.8 (2.5-3.0)     |       |
| Incidence rate of HK / 1,000 person-years (95% CI) | 2.69 (2.04-3.47)               | 5.55 (4.51-6.76) | 12.15 (10.23-14.32) | 29.01 (24.77-33.75) | 47.67 (37.30-60.04) | 56.53 (34.53-87.31) | 3.72 (1.70-7.07) | 9.27 (8.52-10.06) |       |

\* Patients categorized according to lowest measured eGFR before or on admission date with heart failure; presence of dialysis overrules any eGFR measurement result.

† Conditions possibly underlying heart failure; hierarchical categorization: presence before/at first heart failure diagnosis of 1) cardiomyopathy (with or without any of the following diagnoses); 2) valvular heart disease (with or without any of the other diagnoses except cardiomyopathy); 3) myocardial infarction (with or without atrial fibrillation); 4) atrial fibrillation only; and 5) none of these diagnoses.

‡ Manifest chronic kidney disease was defined on the date of the second of two measurements more than 90 days apart of a creatinine value corresponding to an eGFR below 60 mL/min/1.73m2, or on the first date of a hospital diagnosis of chronic kidney disease.

Abbreviations: ACEis, angiotensin-converting enzyme inhibitors; ARBs, angiotensin-receptor II blockers; CI, confidence interval; eGFR, estimated Glomerular Filtration Rate; HK, hyperkalemia; NSAIDs, non-steroidal anti-inflammatory drugs.



**Table S9. Restricted analysis to patients with 5 K+ tests: Prevalence of risk factors at time of hyperkalemia/index date among heart failure patients and matched comparisons without hyperkalemia**

|                                                                                    | <i>Heart failure patients with first hyperkalemia &gt;5.0 mmol/L</i> | <i>Matched heart failure comparisons without hyperkalemia*</i> | <i>Matched prevalence ratio (95% CI)</i> |
|------------------------------------------------------------------------------------|----------------------------------------------------------------------|----------------------------------------------------------------|------------------------------------------|
| No. of patients                                                                    | 4,284 (100%)                                                         | 4,204 (100%)                                                   | 1.00 (1.00-1.00)                         |
| Females                                                                            | 1,995 (46.6%)                                                        | 1,964 (46.7%)                                                  | 1.00 (0.95-1.04)                         |
| Age, median (quartiles), y                                                         | 78.7 (70.2-85.2)                                                     | 78.9 (70.8-85.2)                                               |                                          |
| K+ tests 6 mo. before HK/index date, median (quartiles)                            | 1.0 (0.0-3.0)                                                        | 1.0 (0.0-3.0)                                                  |                                          |
| Acute heart failure hospitalizations 6 mo. before HK/index date median (quartiles) | 0.0 (0.0-1.0)                                                        | 0.0 (0.0-1.0)                                                  |                                          |
| <b>Conditions underlying heart failure †</b>                                       |                                                                      |                                                                |                                          |
| Cardiomyopathy                                                                     | 261 (6.1%)                                                           | 247 (5.9%)                                                     | 1.04 (0.88-1.23)                         |
| Valvular heart disease                                                             | 720 (16.8%)                                                          | 628 (14.9%)                                                    | 1.13 (1.02-1.24)                         |
| Myocardial infarction                                                              | 1,159 (27.1%)                                                        | 1,141 (27.1%)                                                  | 1.00 (0.9-1.07)                          |
| Any ischemic heart disease                                                         | 1,877 (43.8%)                                                        | 1,798 (42.8%)                                                  | 1.02 (0.98-1.08)                         |
| Atrial fibrillation                                                                | 1,534 (35.8%)                                                        | 1,623 (38.6%)                                                  | 0.93 (0.88-0.98)                         |
| <b>Lowest level of eGFR measured before hyperkalemia/index date</b>                |                                                                      |                                                                |                                          |
| No value below 60 mL/min/1.73m <sup>2</sup>                                        | 502 (11.7%)                                                          | 854 (20.3%)                                                    | 0.58 (0.52-0.64)                         |
| eGFR 45-59 mL/min/1.73m <sup>2</sup>                                               | 762 (17.8%)                                                          | 1,124 (26.7%)                                                  | 0.67 (0.61-0.72)                         |
| eGFR 30-44 mL/min/1.73m <sup>2</sup>                                               | 1,154 (26.9%)                                                        | 1,112 (26.5%)                                                  | 1.02 (0.95-1.09)                         |
| eGFR 15-29 mL/min/1.73m <sup>2</sup>                                               | 1,232 (28.8%)                                                        | 766 (18.2%)                                                    | 1.58 (1.46-1.71)                         |
| eGFR<15 mL/min/1.73m <sup>2</sup>                                                  | 463 (10.8%)                                                          | 198 (4.7%)                                                     | 2.29 (1.95-2.70)                         |
| Dialysis                                                                           | 117 (2.7%)                                                           | 43 (1.0%)                                                      | 2.67 (1.89-3.78)                         |
| No eGFR measurement recorded                                                       | 54 (1.3%)                                                            | 107 (2.5%)                                                     | 0.50 (0.36-0.69)                         |
| <b>Selected risk factors for hyperkalemia</b>                                      |                                                                      |                                                                |                                          |
| Diabetes                                                                           | 1,194 (27.9%)                                                        | 850 (20.2%)                                                    | 1.38 (1.28-1.49)                         |
| Chronic kidney disease ‡                                                           | 2,815 (65.7%)                                                        | 2,247 (53.4%)                                                  | 1.23 (1.19-1.27)                         |

|                                                            | <i>Heart failure patients with first hyperkalemia &gt;5.0 mmol/L</i> | <i>Matched heart failure comparisons without hyperkalemia*</i> | <i>Matched prevalence ratio (95% CI)</i> |
|------------------------------------------------------------|----------------------------------------------------------------------|----------------------------------------------------------------|------------------------------------------|
| <b>Other comorbidities</b>                                 |                                                                      |                                                                |                                          |
| Hypertension                                               | 3,436 (80.2%)                                                        | 3,264 (77.6%)                                                  | 1.03 (1.01-1.06)                         |
| Peripheral vascular disease                                | 680 (15.9%)                                                          | 579 (13.8%)                                                    | 1.15 (1.0-1.28)                          |
| Cerebrovascular disease                                    | 803 (18.7%)                                                          | 814 (19.4%)                                                    | 0.97 (0.9-1.06)                          |
| Chronic pulmonary disease                                  | 1,051 (24.5%)                                                        | 906 (21.6%)                                                    | 1.14 (1.1-1.23)                          |
| Peptic ulcer disease                                       | 509 (11.9%)                                                          | 448 (10.7%)                                                    | 1.11 (1.0-1.26)                          |
| Any malignant disease                                      | 704 (16.4%)                                                          | 681 (16.2%)                                                    | 1.01 (0.92-1.12)                         |
| Alcoholism-related disorders                               | 398 (9.3%)                                                           | 330 (7.8%)                                                     | 1.18 (1.03-1.36)                         |
| Medical obesity                                            | 330 (7.7%)                                                           | 260 (6.2%)                                                     | 1.25 (1.06-1.46)                         |
| <b>Use of specific hyperkalemia-associated medications</b> |                                                                      |                                                                |                                          |
| ACEis overall                                              | 1,829 (42.7%)                                                        | 1,641 (39.0%)                                                  | 1.09 (1.04-1.15)                         |
| Ramipril                                                   | 1,240 (37.9%)                                                        | 1,064 (34.4%)                                                  | 1.11 (1.02-1.21)                         |
| Enalapril                                                  | 433 (10.1%)                                                          | 358 (8.5%)                                                     | 1.19 (1.04-1.36)                         |
| Other ACEis                                                | 469 (10.9%)                                                          | 477 (11.3%)                                                    | 0.96 (0.86-1.09)                         |
| ACEis/diuretics combination                                | 137 (3.2%)                                                           | 104 (2.5%)                                                     | 1.29 (1.01-1.66)                         |
| ARBs overall                                               | 637 (14.9%)                                                          | 549 (13.1%)                                                    | 1.14 (1.02-1.27)                         |
| Losartan                                                   | 246 (5.7%)                                                           | 235 (5.6%)                                                     | 1.03 (0.86-1.22)                         |
| Candesartan                                                | 170 (4.0%)                                                           | 107 (2.5%)                                                     | 1.56 (1.23-1.98)                         |
| Other ARBs                                                 | 94 (2.2%)                                                            | 92 (2.2%)                                                      | 1.00 (0.75-1.33)                         |
| ARBs/diuretics combination                                 | 173 (4.0%)                                                           | 174 (4.1%)                                                     | 0.98 (0.79-1.20)                         |
| Spironolactone                                             | 1,289 (30.1%)                                                        | 856 (20.4%)                                                    | 1.48 (1.37-1.59)                         |
| Potassium supplements                                      | 1,969 (46.0%)                                                        | 2,021 (48.1%)                                                  | 0.96 (0.91-1.00)                         |
| Loop diuretics                                             | 2,628 (61.3%)                                                        | 2,464 (58.6%)                                                  | 1.05 (1.01-1.08)                         |
| NSAIDs                                                     | 904 (21.1%)                                                          | 929 (22.1%)                                                    | 0.95 (0.88-1.04)                         |
| Trimetoprim                                                | 130 (3.0%)                                                           | 129 (3.1%)                                                     | 0.99 (0.78-1.26)                         |
| Macrolides                                                 | 539 (12.6%)                                                          | 456 (10.8%)                                                    | 1.16 (1.03-1.30)                         |

\* Heart failure comparison patients without hyperkalemia matched on age, sex, and duration of heart failure on the hyperkalemia/index date

† As present at the time of heart failure diagnosis.

‡ Manifest CKD was defined on the date of the second of two measurements more than 90 days apart of a creatinine value corresponding to an eGFR below 60 mL/min/1.73m<sup>2</sup>, or on the first date of a hospital diagnosis of chronic kidney disease, see text and Supplementary material with codes

Abbreviations: ACEis, angiotensin-converting enzyme inhibitors; ARBs, angiotensin-receptor II blockers; CI, confidence interval; eGFR, estimated Glomerular Filtration Rate; NSAIDs, non-steroidal anti-inflammatory drugs; PR, prevalence ratio

**Table S10. Restricted analysis to patients with 5 K+ tests: Hazard ratios for clinical outcomes 6 months after hyperkalemia (HK) versus fully matched comparisons without HK.**

|                                   | Heart failure patients with first HK >5.0 mmol/L | Matched* heart failure comparisons without HK |                                       |                                                       |
|-----------------------------------|--------------------------------------------------|-----------------------------------------------|---------------------------------------|-------------------------------------------------------|
| Outcome                           | n (Rate per 1,000 person-y)                      | n (Rate per 1,000 person-y)                   | Fully adjusted† Hazard Ratio (95% CI) | Prior-event-rate-ratio adjusted Hazard Ratio (95% CI) |
| Any hospital outpatient contact   | 2,604 (3,326.63)                                 | 2,571 (2,293.14)                              | 1.35 (1.27-1.42)                      | 1.35 (1.26-1.45)                                      |
| Any acute hospitalization         | 3,270 (5,344.31)                                 | 2,386 (2,123.88)                              | 1.99 (1.89-2.11)                      | 2.10 (1.97-2.24)                                      |
| Any non-acute hospitalization     | 914 (787.09)                                     | 930 (582.76)                                  | 1.33 (1.20-1.46)                      | 1.29 (1.17-1.46)                                      |
| Any cardiac diagnosis             | 2,823 (3,861.86)                                 | 2,025 (1,668.35)                              | 1.88 (1.77-1.99)                      | 2.07 (1.92-2.21)                                      |
| Ventricular arrhythmia            | 148 (106.70)                                     | 95 (51.39)                                    | 1.99 (1.52-2.59)                      | 2.11 (1.55-3.00)                                      |
| Cardiac arrest                    | 59 (41.51)                                       | 27 (14.40)                                    | 2.95 (1.84-4.74)                      | 3.43 (1.32-10.18)                                     |
| Dialysis procedure                | 105 (75.05)                                      | 28 (14.94)                                    | 2.76 (1.78-4.26)                      | 1.67 (1.11-2.39)                                      |
| Ventilator treatment              | 367 (269.33)                                     | 105 (56.57)                                   | 4.53 (3.63-5.66)                      | 3.93 (2.81-5.81)                                      |
| ICU admission                     | 620 (478.84)                                     | 265 (146.38)                                  | 3.08 (2.65-3.57)                      | 3.18 (2.58-3.97)                                      |
| Heart failure re-admission        | 2,270 (2,567.94)                                 | 1,612 (1,219.48)                              | 1.77 (1.65-1.89)                      | 2.01 (1.87-2.15)                                      |
| ACEi prescription                 | 1,351 (1,434.42)                                 | 1,682 (1,371.36)                              | 0.94 (0.87-1.01)                      | 0.86 (0.81-0.92)                                      |
| ARB prescription                  | 397 (307.06)                                     | 453 (262.90)                                  | 1.06 (0.92-1.22)                      | 0.99 (0.88-1.10)                                      |
| Spirinolactone prescription       | 920 (817.07)                                     | 999 (654.70)                                  | 0.93 (0.85-1.02)                      | 0.72 (0.66-0.78)                                      |
| Potassium supplement prescription | 1,080 (997.58)                                   | 1,956 (1,655.61)                              | 0.65 (0.60-0.70)                      | 0.63 (0.58-0.67)                                      |
| Death                             | 1,764 (1,235.55)                                 | 717 (381.14)                                  | 2.95 (2.70-3.23)                      | -                                                     |

\* Heart failure comparisons without HK individually matched to heart failure patients with HK on age, sex, and heart failure duration, see text.

†Adjusted for age, sex, and heart failure duration by matched design, and, by Cox regression analyses, for heart failure treatment regimen, number of acute heart failure hospitalizations 6 months before the HK/index date, eGFR category, Charlson Comorbidity Index score, presence of diabetes/chronic kidney disease/ hypertension, use of ACEis/ARBs, spironolactone, or potassium supplements

‡The prior-event-rate-ratio adjusted hazard ratio is the ratio of the two age, sex, and heart failure duration matched rate ratios observed 6 months after vs. 6 months before the HK/index date, see text

**Table S11. Primary heart failure diagnosis: Baseline characteristics among patients with a first primary hospital diagnosis of heart failure, stratified by eGFR category and subsequent incidence of hyperkalemia**

|                                                           | eGFR category (mL/min/1.73m2)* |                |                |                |                |                | No eGFR recorded | Total          |
|-----------------------------------------------------------|--------------------------------|----------------|----------------|----------------|----------------|----------------|------------------|----------------|
|                                                           | eGFR >= 60                     | eGFR 45-59     | eGFR 30-44     | eGFR 15-29     | eGFR<15        | Dialysis       |                  |                |
| Number of HF patients (row %)                             | 2,977 (25.0%)                  | 2,586 (21.7%)  | 2,109 (17.7%)  | 1,277 (10.7%)  | 412 (3.5%)     | 124 (1.0%)     | 2,423 (20.3%)    | 11,908 (100%)  |
| Females                                                   | 995 (33.4%)                    | 1,160 (44.9%)  | 1,141 (54.1%)  | 683 (53.5%)    | 211 (51.2%)    | 39 (31.5%)     | 1,154 (47.6%)    | 5,383 (45.2%)  |
| Median age in years (quartiles)                           | 70 (59.6-78.7)                 | 78 (69.3-83.9) | 82 (74.7-87.3) | 83 (76.2-87.9) | 81 (72.7-86.4) | 68 (60.5-78.4) | 79 (70.9-85.5)   | 78 (68.3-84.9) |
| Echocardiography performed before / at first HF admission | 2,107 (70.8%)                  | 1,712 (66.2%)  | 1,313 (62.3%)  | 784 (61.4%)    | 267 (64.8%)    | 86 (69.4%)     | 1,008 (41.6%)    | 7,277 (61.1%)  |
| Heart failure as primary diagnosis                        | 2,977 (100%)                   | 2,586 (100%)   | 2,109 (100%)   | 1,277 (100%)   | 412 (100%)     | 124 (100%)     | 2,423 (100%)     | 11,908 (100%)  |
| <b>Conditions underlying HF</b>                           |                                |                |                |                |                |                |                  |                |
| Cardiomyopathy                                            | 258 (8.7%)                     | 172 (6.7%)     | 94 (4.5%)      | 53 (4.2%)      | 8 (1.9%)       | 5 (4.0%)       | 82 (3.4%)        | 672 (5.6%)     |
| Valvular heart disease                                    | 333 (11.2%)                    | 355 (13.7%)    | 345 (16.4%)    | 233 (18.2%)    | 70 (17.0%)     | 21 (16.9%)     | 247 (10.2%)      | 1,604 (13.5%)  |
| Myocardial infarction                                     | 466 (15.7%)                    | 525 (20.3%)    | 474 (22.5%)    | 351 (27.5%)    | 116 (28.2%)    | 41 (33.1%)     | 362 (14.9%)      | 2,335 (19.6%)  |
| Ischemic heart disease                                    | 858 (28.8%)                    | 897 (34.7%)    | 809 (38.4%)    | 566 (44.3%)    | 181 (43.9%)    | 60 (48.4%)     | 692 (28.6%)      | 4,063 (34.1%)  |
| Atrial fibrillation                                       | 864 (29.0%)                    | 933 (36.1%)    | 822 (39.0%)    | 493 (38.6%)    | 132 (32.0%)    | 25 (20.2%)     | 738 (30.5%)      | 4,007 (33.6%)  |
| <b>Other comorbidities</b>                                |                                |                |                |                |                |                |                  |                |
| Diabetes                                                  | 498 (16.7%)                    | 442 (17.1%)    | 439 (20.8%)    | 351 (27.5%)    | 125 (30.3%)    | 48 (38.7%)     | 407 (16.8%)      | 2,310 (19.4%)  |
| Chronic kidney disease ‡                                  | 21 (0.7%)                      | 1,339 (51.8%)  | 1,663 (78.9%)  | 1,130 (88.5%)  | 379 (92.0%)    | 124 (100%)     | 92 (3.8%)        | 4,748 (39.9%)  |
| Hypertension                                              | 1,490 (50.1%)                  | 1,671 (64.6%)  | 1,539 (73.0%)  | 1,017 (79.6%)  | 337 (81.8%)    | 113 (91.1%)    | 1,132 (46.7%)    | 7,299 (61.3%)  |
| Peripheral vascular disease                               | 186 (6.2%)                     | 263 (10.2%)    | 261 (12.4%)    | 220 (17.2%)    | 96 (23.3%)     | 46 (37.1%)     | 258 (10.6%)      | 1,330 (11.2%)  |
| Cerebrovascular disease                                   | 354 (11.9%)                    | 409 (15.8%)    | 395 (18.7%)    | 278 (21.8%)    | 105 (25.5%)    | 31 (25.0%)     | 370 (15.3%)      | 1,942 (16.3%)  |
| Chronic pulmonary disease                                 | 387 (13.0%)                    | 416 (16.1%)    | 327 (15.5%)    | 215 (16.8%)    | 54 (13.1%)     | 19 (15.3%)     | 345 (14.2%)      | 1,763 (14.8%)  |
| Peptic ulcer disease                                      | 183 (6.1%)                     | 214 (8.3%)     | 227 (10.8%)    | 175 (13.7%)    | 50 (12.1%)     | 23 (18.5%)     | 207 (8.5%)       | 1,079 (9.1%)   |
| Any malignant disease                                     | 366 (12.3%)                    | 375 (14.5%)    | 370 (17.5%)    | 261 (20.4%)    | 83 (20.1%)     | 25 (20.2%)     | 260 (10.7%)      | 1,740 (14.6%)  |
| Alcoholism-related disorders                              | 283 (9.5%)                     | 158 (6.1%)     | 137 (6.5%)     | 102 (8.0%)     | 37 (9.0%)      | 10 (8.1%)      | 138 (5.7%)       | 865 (7.3%)     |

|                                                 | eGFR category (mL/min/1.73m2)* |                  |                  |                  |                  |                  |               | No eGFR recorded | Total |
|-------------------------------------------------|--------------------------------|------------------|------------------|------------------|------------------|------------------|---------------|------------------|-------|
|                                                 | eGFR >= 60                     | eGFR 45-59       | eGFR 30-44       | eGFR 15-29       | eGFR<15          | Dialysis         |               |                  |       |
| Medical obesity                                 | 249 (8.4%)                     | 165 (6.4%)       | 145 (6.9%)       | 92 (7.2%)        | 37 (9.0%)        | 9 (7.3%)         | 129 (5.3%)    | 826 (6.9%)       |       |
| <b>Drug treatment before first HF diagnosis</b> |                                |                  |                  |                  |                  |                  |               |                  |       |
| ACEis overall                                   | 609 (20.5%)                    | 671 (25.9%)      | 559 (26.5%)      | 380 (29.8%)      | 127 (30.8%)      | 42 (33.9%)       | 452 (18.7%)   | 2,840 (23.8%)    |       |
| Ramipril                                        | 263 (8.8%)                     | 276 (10.7%)      | 220 (10.4%)      | 160 (12.5%)      | 51 (12.4%)       | 18 (14.5%)       | 84 (3.5%)     | 1,072 (9.0%)     |       |
| Enalapril                                       | 156 (5.2%)                     | 179 (6.9%)       | 155 (7.3%)       | 112 (8.8%)       | 39 (9.5%)        | 16 (12.9%)       | 129 (5.3%)    | 786 (6.6%)       |       |
| Other ACEis                                     | 156 (5.2%)                     | 171 (6.6%)       | 151 (7.2%)       | 95 (7.4%)        | 30 (7.3%)        | 8 (6.5%)         | 234 (9.7%)    | 845 (7.1%)       |       |
| ACEis/diuretics combination                     | 61 (2.0%)                      | 72 (2.8%)        | 61 (2.9%)        | 38 (3.0%)        | 16 (3.9%)        | 2 (1.6%)         | 26 (1.1%)     | 276 (2.3%)       |       |
| ARBs overall                                    | 228 (7.7%)                     | 270 (10.4%)      | 289 (13.7%)      | 204 (16.0%)      | 72 (17.5%)       | 32 (25.8%)       | 152 (6.3%)    | 1,247 (10.5%)    |       |
| Losartan                                        | 93 (3.1%)                      | 111 (4.3%)       | 120 (5.7%)       | 89 (7.0%)        | 33 (8.0%)        | 15 (12.1%)       | 75 (3.1%)     | 536 (4.5%)       |       |
| Candesartan                                     | 39 (1.3%)                      | 52 (2.0%)        | 47 (2.2%)        | 32 (2.5%)        | 14 (3.4%)        | 11 (8.9%)        | 25 (1.0%)     | 220 (1.8%)       |       |
| Other ARBs                                      | 28 (0.9%)                      | 46 (1.8%)        | 51 (2.4%)        | 24 (1.9%)        | 10 (2.4%)        | 6 (4.8%)         | 29 (1.2%)     | 194 (1.6%)       |       |
| ARBs/diuretics combination                      | 86 (2.9%)                      | 81 (3.1%)        | 93 (4.4%)        | 73 (5.7%)        | 18 (4.4%)        | 3 (2.4%)         | 40 (1.7%)     | 394 (3.3%)       |       |
| Beta blockers                                   | 763 (25.6%)                    | 797 (30.8%)      | 731 (34.7%)      | 504 (39.5%)      | 166 (40.3%)      | 76 (61.3%)       | 565 (23.3%)   | 3,602 (30.2%)    |       |
| Spironolactone                                  | 193 (6.5%)                     | 220 (8.5%)       | 269 (12.8%)      | 207 (16.2%)      | 70 (17.0%)       | 2 (1.6%)         | 326 (13.5%)   | 1,287 (10.8%)    |       |
| Potassium supplements                           | 563 (18.9%)                    | 691 (26.7%)      | 761 (36.1%)      | 528 (41.3%)      | 163 (39.6%)      | 24 (19.4%)       | 864 (35.7%)   | 3,594 (30.2%)    |       |
| Loop diuretics                                  | 757 (25.4%)                    | 917 (35.5%)      | 966 (45.8%)      | 755 (59.1%)      | 260 (63.1%)      | 74 (59.7%)       | 1,066 (44.0%) | 4,795 (40.3%)    |       |
| NSAIDs                                          | 644 (21.6%)                    | 534 (20.6%)      | 447 (21.2%)      | 305 (23.9%)      | 100 (24.3%)      | 11 (8.9%)        | 569 (23.5%)   | 2,610 (21.9%)    |       |
| Trimetoprim                                     | 32 (1.1%)                      | 51 (2.0%)        | 60 (2.8%)        | 67 (5.2%)        | 24 (5.8%)        | 2 (1.6%)         | 75 (3.1%)     | 311 (2.6%)       |       |
| Macrolides                                      | 369 (12.4%)                    | 299 (11.6%)      | 208 (9.9%)       | 160 (12.5%)      | 48 (11.7%)       | 10 (8.1%)        | 309 (12.8%)   | 1,403 (11.8%)    |       |
| <b>HK event &gt;5.0 mmol/L</b>                  |                                |                  |                  |                  |                  |                  |               |                  |       |
| Total N (%) with a first HK event               | 1,164 (39.1%)                  | 1,168 (45.2%)    | 1,104 (52.3%)    | 715 (56.0%)      | 220 (53.4%)      | 78 (62.9%)       | 486 (20.1%)   | 4,935 (41.4%)    |       |
| Median years to event in pts with event         | 0.52                           | 0.44             | 0.19             | 0.10             | 0.11             | 0.15             | 3.81          | 0.37             |       |
| Median no. K+ tests before first event          | 9                              | 8                | 7                | 6                | 6                | 7                | 8             | 8                |       |
| 1-year cumulative incidence, % (95% CI)         | 23.4 (21.4-25.4)               | 29.2 (26.7-31.6) | 37.9 (34.6-41.3) | 45.5 (40.5-50.5) | 45.9 (37.0-54.8) | 51.6 (33.4-69.8) | 3.1 (2.4-3.8) | 26.5 (25.5-27.6) |       |

|                                         | eGFR category (mL/min/1.73m2)* |                  |                  |                  |                  |                  | No eGFR recorded | Total            |
|-----------------------------------------|--------------------------------|------------------|------------------|------------------|------------------|------------------|------------------|------------------|
|                                         | eGFR ≥ 60                      | eGFR 45-59       | eGFR 30-44       | eGFR 15-29       | eGFR <15         | Dialysis         |                  |                  |
| Incidence rate per 1,000 person-years   | 144.6                          | 220.1            | 380.3            | 639.5            | 725.4            | 1,151.7          | 63.3             | 194.1            |
| <b>HK event &gt;5.5 mmol/L</b>          |                                |                  |                  |                  |                  |                  |                  |                  |
| Total N (%) with a first HK event       | 477 (16.0%)                    | 587 (22.7%)      | 611 (29.0%)      | 441 (34.5%)      | 151 (36.7%)      | 61 (49.2%)       | 232 (9.6%)       | 2,560 (21.5%)    |
| Median years to event in pts with event | 1.10                           | 0.82             | 0.47             | 0.19             | 0.09             | 0.22             | 4.28             | 0.64             |
| Median no. K+ tests before first event  | 14                             | 12               | 10               | 8                | 7                | 10               | 12               | 11               |
| 1-year cumulative incidence, % (95% CI) | 7.8 (6.8-8.9)                  | 12.0 (10.6-13.4) | 17.8 (15.8-19.8) | 25.2 (22.0-28.4) | 28.6 (22.5-34.8) | 34.7 (21.9-47.5) | 1.2 (0.8-1.6)    | 12.0 (11.4-12.7) |
| Incidence rate per 1,000 person-years   | 46.4                           | 80.0             | 150.0            | 269.7            | 338.8            | 635.5            | 27.7             | 79.4             |
| <b>HK event &gt;6.0 mmol/L</b>          |                                |                  |                  |                  |                  |                  |                  |                  |
| Total N (%) with a first HK event       | 204 (6.9%)                     | 257 (9.9%)       | 302 (14.3%)      | 235 (18.4%)      | 77 (18.7%)       | 37 (29.8%)       | 109 (4.5%)       | 1,221 (10.3%)    |
| Median years to event in pts with event | 1.61                           | 1.34             | 0.76             | 0.26             | 0.16             | 0.38             | 4.15             | 0.92             |
| Median no. K+ tests before first event  | 18                             | 17               | 13               | 9                | 8                | 10               | 14               | 13               |
| 1-year cumulative incidence, % (95% CI) | 2.9 (2.2-3.5)                  | 4.4 (3.5-5.2)    | 7.7 (6.5-8.9)    | 13.3 (11.2-15.5) | 14.6 (10.6-18.5) | 21.0 (11.9-30.0) | 0.4 (0.2-0.7)    | 5.3 (4.8-5.7)    |
| Incidence rate per 1,000 person-years   | 18.7                           | 31.7             | 64.1             | 123.1            | 138.2            | 253.4            | 12.7             | 34.9             |

\* Patients categorized according to lowest measured eGFR before or on admission date with heart failure; presence of dialysis overrules any eGFR measurement result.

† Conditions possibly underlying heart failure; hierarchical categorization: presence before/at first heart failure diagnosis of 1) cardiomyopathy (with or without any of the following diagnoses); 2) valvular heart disease (with or without any of the other diagnoses except cardiomyopathy); 3) myocardial infarction (with or without atrial fibrillation); 4) atrial fibrillation only; and 5) none of these diagnoses.

‡ Manifest chronic kidney disease was defined on the date of the second of two measurements more than 90 days apart of a creatinine value corresponding to an eGFR below 60 mL/min/1.73m<sup>2</sup>, or on the first date of a hospital diagnosis.

Abbreviations: ACEis, angiotensin-converting enzyme inhibitors; ARBs, angiotensin-receptor II blockers; CI, confidence interval; eGFR, estimated Glomerular Filtration Rate; HK,

**Table S12. Primary heart failure diagnosis: Prevalence of risk factors at time of hyperkalemia/index date among heart failure patients and matched comparisons without hyperkalemia**

|                                                                                    | Heart failure patients with first HK >5.0 mmol/L | Matched* heart failure comparisons without HK | Matched Prevalence Ratio (95% CI) |
|------------------------------------------------------------------------------------|--------------------------------------------------|-----------------------------------------------|-----------------------------------|
| No. of patients                                                                    | 4,935 (100%)                                     | 4,679 (100%)                                  |                                   |
| Females                                                                            | 2,164 (43.9%)                                    | 2,046 (43.7%)                                 |                                   |
| Age, median (quartiles), y                                                         | 78.4 (69.7-85.1)                                 | 78.6 (70.5-84.9)                              |                                   |
| K+ tests 6 mo. before HK/index date, median (quartiles)                            | 5.0 (2.0-10.0)                                   | 2.0 (0.0-5.0)                                 |                                   |
| Acute heart failure hospitalizations 6 mo. before HK/index date median (quartiles) | 0.0 (0.0-1.0)                                    | 0.0 (0.0-1.0)                                 |                                   |
| <b>Conditions underlying heart failure †</b>                                       |                                                  |                                               |                                   |
| Cardiomyopathy                                                                     | 500 (10.1%)                                      | 434 (9.3%)                                    | 1.09 (0.97-1.23)                  |
| Valvular heart disease                                                             | 888 (18.0%)                                      | 702 (15.0%)                                   | 1.20 (1.10-1.31)                  |
| Myocardial infarction                                                              | 1,184 (24.0%)                                    | 995 (21.3%)                                   | 1.13 (1.0-1.22)                   |
| Any ischemic heart disease                                                         | 2,120 (43.0%)                                    | 1,836 (39.2%)                                 | 1.09 (1.04-1.15)                  |
| Atrial fibrillation                                                                | 1,889 (38.3%)                                    | 1,712 (36.6%)                                 | 1.05 (0.99-1.10)                  |
| <b>Lowest eGFR measured before HK/index date</b>                                   |                                                  |                                               |                                   |
| No values below 60 mL/min/1.73m <sup>2</sup>                                       | 661 (13.4%)                                      | 1,020 (21.8%)                                 | 0.61 (0.56-0.67)                  |
| eGFR 45-59 mL/min/1.73m <sup>2</sup>                                               | 1,011 (20.5%)                                    | 1,157 (24.7%)                                 | 0.83 (0.77-0.89)                  |
| eGFR 30-44 mL/min/1.73m <sup>2</sup>                                               | 1,501 (30.4%)                                    | 943 (20.2%)                                   | 1.51 (1.41-1.62)                  |
| eGFR 15-29 mL/min/1.73m <sup>2</sup>                                               | 1,242 (25.2%)                                    | 537 (11.5%)                                   | 2.19 (2.00-2.41)                  |
| eGFR <15 mL/min/1.73m <sup>2</sup>                                                 | 312 (6.3%)                                       | 110 (2.4%)                                    | 2.69 (2.17-3.33)                  |
| Dialysis                                                                           | 112 (2.3%)                                       | 36 (0.8%)                                     | 2.95 (2.03-4.28)                  |
| No eGFR measurement recorded                                                       | 96 (1.9%)                                        | 876 (18.7%)                                   | 0.10 (0.08-0.13)                  |
| <b>Selected pre-defined risk factors for HK</b>                                    |                                                  |                                               |                                   |
| Diabetes                                                                           | 1,360 (27.6%)                                    | 955 (20.4%)                                   | 1.35 (1.26-1.45)                  |
| Chronic kidney disease ‡                                                           | 3,209 (65.0%)                                    | 2,023 (43.2%)                                 | 1.50 (1.45-1.56)                  |
| Hypertension                                                                       | 4,201 (85.1%)                                    | 3,738 (79.9%)                                 | 1.07 (1.05-1.09)                  |
| <b>Other comorbidities</b>                                                         |                                                  |                                               |                                   |
| Peripheral vascular disease                                                        | 795 (16.1%)                                      | 577 (12.3%)                                   | 1.31 (1.2-1.44)                   |
| Cerebrovascular disease                                                            | 932 (18.9%)                                      | 744 (15.9%)                                   | 1.19 (1.1-1.30)                   |
| Chronic pulmonary disease                                                          | 1,116 (22.6%)                                    | 949 (20.3%)                                   | 1.11 (1.0-1.20)                   |
| Peptic ulcer disease                                                               | 511 (10.4%)                                      | 437 (9.3%)                                    | 1.11 (1.0-1.25)                   |
| Any malignant disease                                                              | 818 (16.6%)                                      | 651 (13.9%)                                   | 1.19 (1.08-1.31)                  |
| Alcoholism-related disorders                                                       | 458 (9.3%)                                       | 325 (6.9%)                                    | 1.34 (1.17-1.53)                  |
| Medical obesity                                                                    | 435 (8.8%)                                       | 344 (7.4%)                                    | 1.20 (1.05-1.37)                  |

|                                                   | Heart failure patients with first HK >5.0 mmol/L | Matched* heart failure comparisons without HK | Matched Prevalence Ratio (95% CI) |
|---------------------------------------------------|--------------------------------------------------|-----------------------------------------------|-----------------------------------|
| <b>Use of hyperkalemia-associated medications</b> |                                                  |                                               |                                   |
| ACEis overall                                     | 2,471 (50.1%)                                    | 2,186 (46.7%)                                 | 1.07 (1.03-1.12)                  |
| Ramipril                                          | 1,231 (24.9%)                                    | 1,039 (22.2%)                                 | 1.12 (1.05-1.21)                  |
| Enalapril                                         | 524 (10.6%)                                      | 426 (9.1%)                                    | 1.17 (1.03-1.32)                  |
| Other ACEis                                       | 728 (14.8%)                                      | 722 (15.4%)                                   | 0.96 (0.87-1.05)                  |
| ACEis/diuretics combination                       | 120 (2.4%)                                       | 106 (2.3%)                                    | 1.07 (0.83-1.39)                  |
| ARBs overall                                      | 734 (14.9%)                                      | 663 (14.2%)                                   | 1.05 (0.95-1.16)                  |
| Losartan                                          | 335 (6.8%)                                       | 331 (7.1%)                                    | 0.96 (0.83-1.11)                  |
| Candesartan                                       | 191 (3.9%)                                       | 119 (2.5%)                                    | 1.52 (1.21-1.91)                  |
| Other ARBs                                        | 119 (2.4%)                                       | 107 (2.3%)                                    | 1.05 (0.81-1.36)                  |
| ARBs/diuretics combination                        | 146 (3.0%)                                       | 161 (3.4%)                                    | 0.86 (0.69-1.07)                  |
| Spironolactone                                    | 1,908 (38.7%)                                    | 1,247 (26.7%)                                 | 1.45 (1.37-1.54)                  |
| Potassium supplements                             | 2,567 (52.0%)                                    | 2,539 (54.3%)                                 | 0.96 (0.92-1.00)                  |
| Loop diuretics                                    | 3,438 (69.7%)                                    | 3,246 (69.4%)                                 | 1.00 (0.98-1.03)                  |
| NSAIDs                                            | 1,039 (21.1%)                                    | 996 (21.3%)                                   | 0.99 (0.92-1.07)                  |
| Trimetoprim                                       | 153 (3.1%)                                       | 156 (3.3%)                                    | 0.93 (0.75-1.16)                  |
| Macrolides                                        | 607 (12.3%)                                      | 579 (12.4%)                                   | 0.99 (0.89-1.11)                  |

\* Heart failure comparison patients without hyperkalemia matched on age, sex, and duration of heart failure on the hyperkalemia/index date

As present at the time of heart failure diagnosis.

‡ Manifest chronic kidney disease was defined on the date of the second of two measurements more than 90 days apart of a creatinine value corresponding to an eGFR below 60 mL/min/1.73m<sup>2</sup>, or on the first date of a hospital diagnosis of chronic kidney disease, see text and Supplementary material with codes

Abbreviations: ACEis, angiotensin-converting enzyme inhibitors; ARBs, angiotensin-receptor II blockers; CI, confidence interval; eGFR, estimated Glomerular Filtration Rate; HK, hyperkalemia; NSAIDs, non-steroidal anti-inflammatory drugs; PR, prevalence ratio



**Table S13. Primary heart failure diagnosis: Hazard ratios for clinical outcomes 6 months after hyperkalemia (HK) versus fully matched comparisons without HK**

|                                   | Heart failure patients with first HK >5.0 mmol/L | Matched* heart failure comparisons without HK |                                       |                                                        |
|-----------------------------------|--------------------------------------------------|-----------------------------------------------|---------------------------------------|--------------------------------------------------------|
| Outcome                           | n (Rate per 1,000 person-y)                      | n (Rate per 1,000 person-y)                   | Fully adjusted† Hazard Ratio (95% CI) | Prior-event-rate-ratio adjusted‡ Hazard Ratio (95% CI) |
| Any hospital outpatient contact   | 3,029 (2,949.79)                                 | 2,449 (1,680.51)                              | 1.56 (1.47-1.66)                      | 1.36 (1.27-1.46)                                       |
| Any acute hospitalization         | 3,465 (3,883.09)                                 | 1,872 (1,173.22)                              | 2.66 (2.49-2.83)                      | 2.16 (2.04-2.31)                                       |
| Any non-acute hospitalization     | 1,130 (767.97)                                   | 716 (364.29)                                  | 2.08 (1.87-2.30)                      | 1.68 (1.50-1.93)                                       |
| Any cardiac diagnosis             | 2,874 (2,701.82)                                 | 1,546 (920.94)                                | 2.43 (2.27-2.60)                      | 2.15 (2.01-2.30)                                       |
| Ventricular arrhythmia            | 165 (93.24)                                      | 67 (31.10)                                    | 3.01 (2.21-4.12)                      | 1.85 (1.32-2.79)                                       |
| Cardiac arrest                    | 54 (29.75)                                       | 8 (3.69)                                      | 8.47 (3.91-18.33)                     | 11.87 (3.12-70.70)                                     |
| Dialysis procedure                | 107 (59.68)                                      | 20 (9.23)                                     | 2.36 (1.43-3.89)                      | 1.72 (1.07-2.68)                                       |
| Ventilator treatment              | 287 (162.76)                                     | 54 (25.01)                                    | 6.08 (4.48-8.24)                      | 4.08 (2.39-7.15)                                       |
| ICU admission                     | 565 (336.49)                                     | 140 (65.48)                                   | 5.24 (4.30-6.39)                      | 4.13 (3.02-5.56)                                       |
| Heart failure re-admission        | 2,063 (1,606.34)                                 | 1,192 (671.69)                                | 2.07 (1.91-2.24)                      | 1.94 (1.81-2.10)                                       |
| ACEi prescription                 | 2,021 (1,874.45)                                 | 2,130 (1,585.87)                              | 1.05 (0.98-1.12)                      | 0.98 (0.93-1.03)                                       |
| ARB prescription                  | 525 (321.02)                                     | 607 (311.84)                                  | 0.95 (0.83-1.07)                      | 0.98 (0.90-1.07)                                       |
| Spirolactone prescription         | 1,508 (1,148.79)                                 | 1,369 (806.60)                                | 1.03 (0.95-1.12)                      | 0.82 (0.78-0.88)                                       |
| Potassium supplement prescription | 1,630 (1,271.59)                                 | 2,381 (1,833.14)                              | 0.77 (0.72-0.82)                      | 0.74 (0.69-0.78)                                       |
| Death                             | 1,645 (903.28)                                   | 549 (252.85)                                  | 3.36 (3.02-3.74)                      | -                                                      |

\* Heart failure comparisons without HK individually matched to heart failure patients with HK on age, sex, and heart failure duration, see text.

† Adjusted for age, sex, and heart failure duration by matched design, and, by Cox regression analyses, for heart failure treatment regimen, number of acute heart failure hospitalizations 6 months before the HK/index date, eGFR category, Charlson Comorbidity Index score, presence of diabetes/chronic kidney disease/ hypertension, use of ACEis/ARBs, spironolactone, or potassium supplements

‡ The prior-event-rate-ratio adjusted hazard ratio is the ratio of the two age, sex, and heart failure duration matched rate ratios observed 6 months after vs. 6 months before the HK/index date, see text

Abbreviations: ACEi, angiotensin-converting enzyme inhibitors; ARB, angiotensin-receptor II blocker, CI, confidence interval; HK, hyperkalemia; ICU, intensive care unit

**Table S14. Hazard ratios for clinical outcomes 6 months after hyperkalemia (HK) versus fully matched comparisons without HK, restricted to potassium measured in-hospital.**

|                                   | Heart failure patients with first HK >5.0 mmol/L | Matched* heart failure comparisons without HK |                                       |                                                        |
|-----------------------------------|--------------------------------------------------|-----------------------------------------------|---------------------------------------|--------------------------------------------------------|
| Outcome                           | n (Rate per 1,000 person-y)                      | n (Rate per 1,000 person-y)                   | Fully adjusted† Hazard Ratio (95% CI) | Prior-event-rate-ratio adjusted‡ Hazard Ratio (95% CI) |
| Any hospital outpatient contact   | 5,087 (4,451.14)                                 | 4,206 (1,864.31)                              | 1.96 (1.87-2.05)                      | 1.55 (1.47-1.63)                                       |
| Any acute hospitalization         | 7,366 (18,262.56)                                | 3,838 (1,726.00)                              | 4.35 (4.16-4.55)                      | 3.81 (3.63-4.02)                                       |
| Any non-acute hospitalization     | 2,092 (1,218.32)                                 | 1,368 (450.87)                                | 2.35 (2.19-2.54)                      | 1.93 (1.75-2.12)                                       |
| Any cardiac diagnosis             | 6,273 (8,756.88)                                 | 3,342 (1,417.80)                              | 3.27 (3.12-3.42)                      | 3.20 (3.03-3.39)                                       |
| Ventricular arrhythmia            | 389 (172.72)                                     | 184 (54.12)                                   | 2.69 (2.23-3.25)                      | 2.91 (2.19-3.75)                                       |
| Cardiac arrest                    | 146 (62.14)                                      | 34 (9.87)                                     | 6.21 (4.17-9.25)                      | 10.04 (4.81-25.59)                                     |
| Dialysis procedure                | 147 (63.03)                                      | 48 (13.94)                                    | 2.25 (1.60-3.18)                      | 1.74 (1.14-2.52)                                       |
| Ventilator treatment              | 951 (436.06)                                     | 150 (43.91)                                   | 8.48 (7.08-10.14)                     | 5.35 (3.84-7.30)                                       |
| ICU admission                     | 1,716 (875.82)                                   | 364 (108.40)                                  | 6.71 (5.96-7.56)                      | 5.56 (4.63-6.95)                                       |
| Heart failure re-admission        | 4,708 (4,031.60)                                 | 2,716 (1,080.47)                              | 2.45 (2.33-2.58)                      | 2.66 (2.51-2.83)                                       |
| ACEi prescription                 | 2,227 (1,398.51)                                 | 2,999 (1,312.24)                              | 0.99 (0.93-1.05)                      | 1.01 (0.96-1.07)                                       |
| ARB prescription                  | 570 (260.35)                                     | 898 (286.35)                                  | 0.82 (0.73-0.91)                      | 0.97 (0.89-1.04)                                       |
| Spirolactone prescription         | 1,597 (857.69)                                   | 1,852 (659.39)                                | 1.06 (0.98-1.13)                      | 0.88 (0.82-0.94)                                       |
| Potassium supplement prescription | 2,467 (1,539.61)                                 | 3,749 (1,796.90)                              | 0.84 (0.80-0.89)                      | 0.77 (0.73-0.81)                                       |
| Death                             | 3,727 (1,570.93)                                 | 1,152 (333.49)                                | 3.92 (3.65-4.21)                      | -                                                      |

\* Heart failure comparisons without HK individually matched to heart failure patients with HK on age, sex, and heart failure duration, see text.

† Adjusted for age, sex, and heart failure duration by matched design, and, by Cox regression analyses, for heart failure treatment regimen, number of acute heart failure hospitalizations 6 months before the HK/index date, eGFR category, Charlson Comorbidity Index score, presence of diabetes/chronic kidney disease/ hypertension, use of ACEis/ARBs, spironolactone, or potassium supplements

‡ The prior-event-rate-ratio adjusted hazard ratio is the ratio of the two age, sex, and heart failure duration matched rate ratios observed 6 months after vs. 6 months before the HK/index date, see text

Abbreviations: ACEi, angiotensin-converting enzyme inhibitors; ARB, angiotensin-receptor II blocker, CI, confidence interval; HK, hyperkalemia; ICU, intensive care unit

**Table S15. Hazard ratios for clinical outcomes 6 months after hyperkalemia (HK) versus fully matched comparisons without HK, restricted to potassium measured in the primary health care sector.**

|                                   | Heart failure patients with first HK >5.0 mmol/L | Matched* heart failure comparisons without HK |                                       |                                                        |
|-----------------------------------|--------------------------------------------------|-----------------------------------------------|---------------------------------------|--------------------------------------------------------|
| Outcome                           | n (Rate per 1,000 person-y)                      | n (Rate per 1,000 person-y)                   | Fully adjusted† Hazard Ratio (95% CI) | Prior-event-rate-ratio adjusted‡ Hazard Ratio (95% CI) |
| Any hospital outpatient contact   | 2,673 (2,090.32)                                 | 2,238 (1,495.87)                              | 1.26 (1.19-1.34)                      | 1.26 (1.18-1.35)                                       |
| Any acute hospitalization         | 1,734 (1,070.90)                                 | 1,263 (693.57)                                | 1.39 (1.28-1.50)                      | 1.25 (1.16-1.35)                                       |
| Any non-acute hospitalization     | 694 (372.72)                                     | 545 (275.03)                                  | 1.29 (1.15-1.46)                      | 1.26 (1.09-1.43)                                       |
| Any cardiac diagnosis             | 1,219 (689.96)                                   | 856 (444.82)                                  | 1.33 (1.20-1.46)                      | 1.26 (1.15-1.40)                                       |
| Ventricular arrhythmia            | 61 (29.90)                                       | 46 (21.70)                                    | 1.03 (0.68-1.56)                      | 1.29 (0.87-2.07)                                       |
| Cardiac arrest                    | 10 (4.87)                                        | 7 (3.28)                                      | 1.72 (0.59-5.04)                      | 2.05 (0.65-7.83)                                       |
| Dialysis procedure                | 76 (37.35)                                       | 13 (6.11)                                     | 1.65 (0.89-3.06)                      | 0.72 (0.33-1.30)                                       |
| Ventilator treatment              | 39 (19.01)                                       | 35 (16.46)                                    | 1.07 (0.65-1.75)                      | 0.98 (0.54-1.68)                                       |
| ICU admission                     | 121 (59.49)                                      | 95 (45.00)                                    | 1.12 (0.83-1.50)                      | 1.32 (0.93-1.88)                                       |
| Heart failure re-admission        | 601 (312.81)                                     | 431 (212.04)                                  | 1.26 (1.10-1.44)                      | 1.20 (1.05-1.37)                                       |
| ACEi prescription                 | 2,203 (1,799.25)                                 | 1,864 (1,311.05)                              | 1.09 (1.02-1.17)                      | 0.93 (0.89-0.96)                                       |
| ARB prescription                  | 653 (358.75)                                     | 508 (260.31)                                  | 1.27 (1.12-1.45)                      | 1.04 (0.97-1.12)                                       |
| Spironolactone prescription       | 1,585 (1,048.59)                                 | 1,024 (573.22)                                | 1.04 (0.96-1.14)                      | 0.81 (0.76-0.85)                                       |
| Potassium supplement prescription | 1,642 (1,098.47)                                 | 2,170 (1,586.37)                              | 0.76 (0.71-0.81)                      | 0.73 (0.70-0.77)                                       |
| Death                             | 730 (355.17)                                     | 390 (182.92)                                  | 2.00 (1.74-2.30)                      | -                                                      |

\* Heart failure comparisons without HK individually matched to heart failure patients with HK on age, sex, and heart failure duration, see text.

† Adjusted for age, sex, and heart failure duration by matched design, and, by Cox regression analyses, for heart failure treatment regimen, number of acute heart failure hospitalizations 6 months before the HK/index date, eGFR category, Charlson Comorbidity Index score, presence of diabetes/chronic kidney disease/ hypertension, use of ACEis/ARBs, spironolactone, or potassium supplements

‡ The prior-event-rate-ratio adjusted hazard ratio is the ratio of the two age, sex, and heart failure duration matched rate ratios observed 6 months after vs. 6 months before the HK/index date, see text

Abbreviations: ACEi, angiotensin-converting enzyme inhibitors; ARB, angiotensin-receptor II blocker, CI, confidence interval; HK, hyperkalemia; ICU, intensive care unit

**Table S16. Hazard ratios for clinical outcomes 6 months after hyperkalemia (HK) versus fully matched comparisons without HK, restricted to patients with less than 10 potassium tests.**

|                                   | Heart failure patients with first HK >5.0 mmol/L | Matched* heart failure comparisons without HK |                                       |                                                        |
|-----------------------------------|--------------------------------------------------|-----------------------------------------------|---------------------------------------|--------------------------------------------------------|
| Outcome                           | n (Rate per 1,000 person-y)                      | n (Rate per 1,000 person-y)                   | Fully adjusted† Hazard Ratio (95% CI) | Prior-event-rate-ratio adjusted‡ Hazard Ratio (95% CI) |
| Any hospital outpatient contact   | 4,278 (3,053.33)                                 | 3,954 (2,014.09)                              | 1.39 (1.33-1.46)                      | 1.36 (1.29-1.44)                                       |
| Any acute hospitalization         | 5,359 (4,953.68)                                 | 3,752 (1,994.11)                              | 1.96 (1.88-2.05)                      | 2.07 (1.97-2.17)                                       |
| Any non-acute hospitalization     | 1,564 (770.64)                                   | 1,391 (521.71)                                | 1.41 (1.30-1.52)                      | 1.61 (1.45-1.79)                                       |
| Any cardiac diagnosis             | 4,660 (3,597.83)                                 | 3,326 (1,665.22)                              | 1.78 (1.70-1.86)                      | 1.94 (1.83-2.06)                                       |
| Ventricular arrhythmia            | 266 (109.04)                                     | 181 (59.60)                                   | 1.73 (1.41-2.11)                      | 2.30 (1.72-3.10)                                       |
| Cardiac arrest                    | 102 (40.73)                                      | 32 (10.37)                                    | 4.11 (2.71-6.24)                      | 8.30 (3.48-25.71)                                      |
| Dialysis procedure                | 105 (42.15)                                      | 48 (15.56)                                    | 1.41 (0.98-2.02)                      | 0.97 (0.63-1.40)                                       |
| Ventilator treatment              | 577 (241.00)                                     | 146 (47.76)                                   | 4.76 (3.94-5.74)                      | 5.04 (3.71-7.59)                                       |
| ICU admission                     | 1,009 (444.64)                                   | 371 (123.88)                                  | 3.41 (3.01-3.86)                      | 4.17 (3.40-5.17)                                       |
| Heart failure re-admission        | 3,790 (2,445.76)                                 | 2,769 (1,292.29)                              | 1.61 (1.53-1.70)                      | 1.78 (1.68-1.88)                                       |
| ACEi prescription                 | 2,514 (1,576.24)                                 | 2,700 (1,318.74)                              | 1.04 (0.98-1.10)                      | 0.95 (0.91-1.00)                                       |
| ARB prescription                  | 680 (297.26)                                     | 750 (264.99)                                  | 1.05 (0.95-1.17)                      | 1.06 (0.97-1.14)                                       |
| Spironolactone prescription       | 1,738 (897.09)                                   | 1,701 (679.34)                                | 1.04 (0.97-1.12)                      | 0.81 (0.76-0.86)                                       |
| Potassium supplement prescription | 2,112 (1,157.71)                                 | 3,462 (1,877.08)                              | 0.69 (0.66-0.74)                      | 0.70 (0.66-0.74)                                       |
| Death                             | 2,568 (1,018.82)                                 | 1,172 (378.73)                                | 2.65 (2.46-2.85)                      | -                                                      |

\* Heart failure comparisons without HK individually matched to heart failure patients with HK on age, sex, and heart failure duration, see text.

† Adjusted for age, sex, and heart failure duration by matched design, and, by Cox regression analyses, for heart failure treatment regimen, number of acute heart failure hospitalizations 6 months before the HK/index date, eGFR category, Charlson Comorbidity Index score, presence of diabetes/chronic kidney disease/ hypertension, use of ACEis/ARBs, spironolactone, or potassium supplements

‡ The prior-event-rate-ratio adjusted hazard ratio is the ratio of the two age, sex, and heart failure duration matched rate ratios observed 6 months after vs. 6 months before the HK/index date, see text

Abbreviations: ACEi, angiotensin-converting enzyme inhibitors; ARB, angiotensin-receptor II blocker, CI, confidence interval; HK, hyperkalemia; ICU, intensive care unit

**Table S17. Hazard ratios for clinical outcomes 6 months after hyperkalemia (HK) versus fully matched comparisons without HK, restricted to patients with 10 or more potassium tests.**

|                                   | Heart failure patients with first HK >5.0 mmol/L | Matched* heart failure comparisons without HK |                                       |                                                        |
|-----------------------------------|--------------------------------------------------|-----------------------------------------------|---------------------------------------|--------------------------------------------------------|
| Outcome                           | n (Rate per 1,000 person-y)                      | n (Rate per 1,000 person-y)                   | Fully adjusted† Hazard Ratio (95% CI) | Prior-event-rate-ratio adjusted‡ Hazard Ratio (95% CI) |
| Any hospital outpatient contact   | 3,482 (3,412.02)                                 | 2,490 (1,391.83)                              | 1.98 (1.87-2.10)                      | 1.46 (1.37-1.57)                                       |
| Any acute hospitalization         | 3,741 (3,976.74)                                 | 1,349 (623.64)                                | 4.59 (4.28-4.93)                      | 2.93 (2.74-3.15)                                       |
| Any non-acute hospitalization     | 1,222 (788.58)                                   | 522 (222.18)                                  | 3.30 (2.94-3.70)                      | 1.97 (1.75-2.23)                                       |
| Any cardiac diagnosis             | 2,832 (2,384.05)                                 | 872 (381.75)                                  | 4.53 (4.15-4.94)                      | 3.40 (3.11-3.72)                                       |
| Ventricular arrhythmia            | 184 (99.32)                                      | 49 (19.74)                                    | 3.96 (2.79-5.62)                      | 3.14 (2.17-4.57)                                       |
| Cardiac arrest                    | 54 (28.41)                                       | 9 (3.61)                                      | 9.28 (3.88-22.16)                     | 8.59 (3.14-34.09)                                      |
| Dialysis procedure                | 118 (62.91)                                      | 13 (5.22)                                     | 3.05 (1.69-5.50)                      | 1.84 (1.01-3.21)                                       |
| Ventilator treatment              | 413 (224.65)                                     | 39 (15.69)                                    | 15.04 (10.40-21.74)                   | 5.44 (3.43-9.06)                                       |
| ICU admission                     | 828 (480.27)                                     | 88 (35.57)                                    | 11.64 (9.21-14.71)                    | 7.16 (5.39-9.62)                                       |
| Heart failure re-admission        | 1,519 (986.73)                                   | 378 (157.26)                                  | 4.72 (4.15-5.38)                      | 4.08 (3.61-4.65)                                       |
| ACEi prescription                 | 1,916 (1,568.09)                                 | 2,163 (1,303.21)                              | 1.00 (0.93-1.07)                      | 1.03 (0.99-1.08)                                       |
| ARB prescription                  | 543 (315.34)                                     | 656 (290.62)                                  | 0.93 (0.81-1.06)                      | 1.00 (0.93-1.08)                                       |
| Spirolactone prescription         | 1,444 (1,005.45)                                 | 1,175 (561.90)                                | 1.04 (0.95-1.13)                      | 0.92 (0.87-0.98)                                       |
| Potassium supplement prescription | 1,997 (1,568.89)                                 | 2,457 (1,526.17)                              | 0.94 (0.88-1.01)                      | 0.83 (0.79-0.87)                                       |
| Death                             | 1,889 (990.44)                                   | 370 (148.48)                                  | 5.60 (4.94-6.36)                      | -                                                      |

\* Heart failure comparisons without HK individually matched to heart failure patients with HK on age, sex, and heart failure duration, see text.

† Adjusted for age, sex, and heart failure duration by matched design, and, by Cox regression analyses, for heart failure treatment regimen, number of acute heart failure hospitalizations 6 months before the HK/index date, eGFR category, Charlson Comorbidity Index score, presence of diabetes/chronic kidney disease/ hypertension, use of ACEis/ARBs, spironolactone, or potassium supplements

‡ The prior-event-rate-ratio adjusted hazard ratio is the ratio of the two age, sex, and heart failure duration matched rate ratios observed 6 months after vs. 6 months before the HK/index date, see text

Abbreviations: ACEi, angiotensin-converting enzyme inhibitors; ARB, angiotensin-receptor II blocker, CI, confidence interval; HK, hyperkalemia; ICU, intensive care unit

**Figure S1. Required strength of an unmeasured confounder to explain our associations assuming that 50% of the heart failure population had hyperkalemia and that the prevalence of the unmeasured confounder was 25%.**

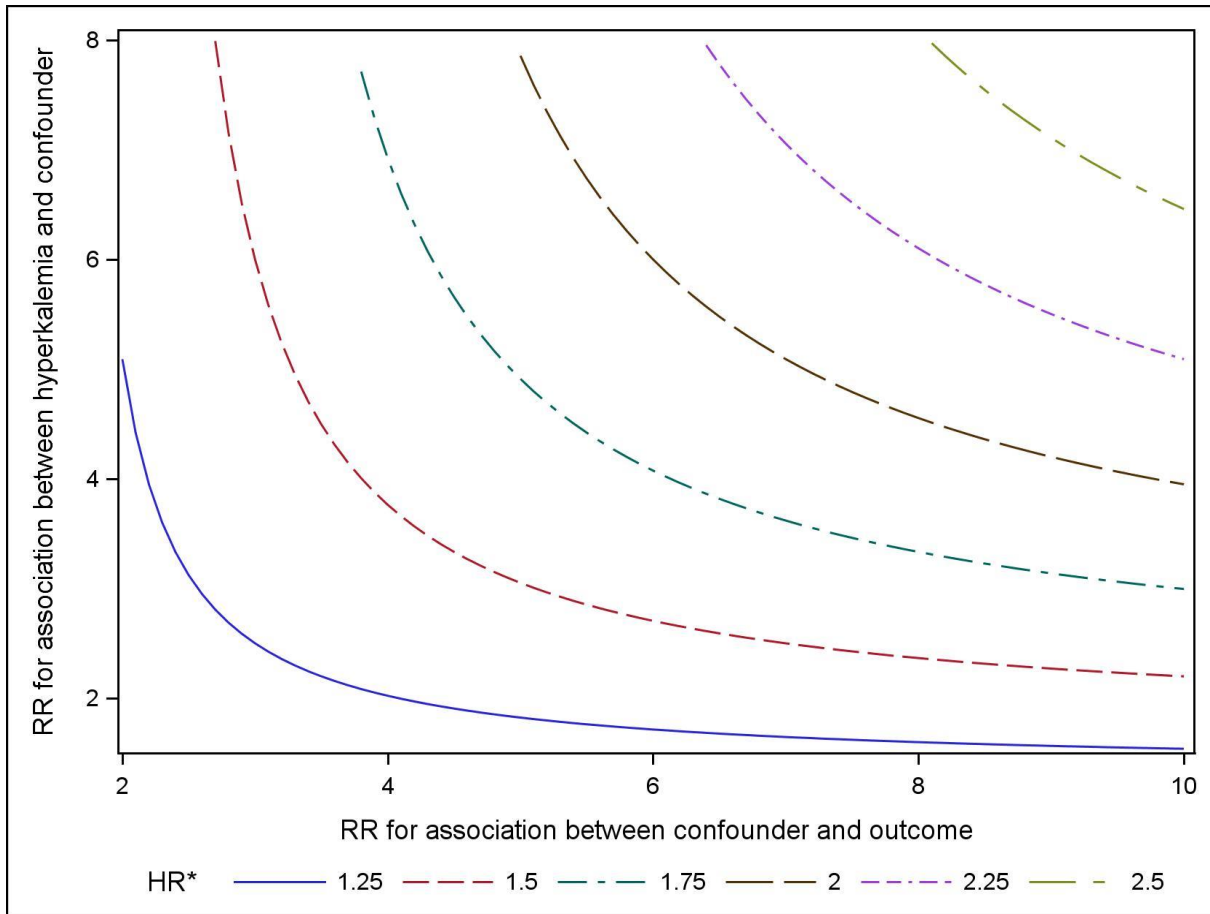

\*HR indicates hazard ratio for the association between hyperkalemia and the different outcomes. For example, to explain an adjusted HR of ~ 2.0 (brown line) for acute hospitalization associated with hyperkalemia, a confounder that is four times more frequent among hyperkalemia than non-hyperkalemia patients would need to increase the hazard of acute hospitalization by a factor of 10 or more to explain our findings fully, if no increased hazard actually existed.
